# Supplementary material for: TAC-seq: targeted DNA and RNA sequencing for precise biomarker molecule counting
Source: PubMed Central journal article supplement (PMC6299075; doi:10.1038/s41525-018-0072-5), 2018-12-18
Supplement: 41525_2018_72_MOESM1_ESM.pdf [file 41525_2018_72_MOESM1_ESM.pdf]

## Supplementary materials

### Supplementary methods

#### Biomarker selection and TAC-seq probe design

The biomarkers of endometrial receptivity were selected based on our previous publication.<sup>19</sup> Briefly, nine studies including a total of 164 endometrial samples from fertile women were included in a meta-analysis using the Robust Rank Aggregation method. In the current study, we used the 57 mRNAs identified as potential endometrial receptivity biomarkers for distinguishing the pre-receptive and receptive endometrial samples. A pair of TAC-seq detector DNA oligonucleotide probes (left detector and right detector) was designed for every targeted gene using the special TAC-seq probe design software (<http://nipt.ut.ee/design/>). All of the oligonucleotides used in this study are listed in Supplemental Table 3. Both the left and right detectors consisted of a specific sequence (27-bp), an UMI (4-bp) and a left universal sequence or right universal sequence. Each detector pair targeted the coding sequence in the Consensus Coding Sequence Set (CCDS). For genes without CCDS, the most likely transcript was chosen manually from the Ensembl 87 database. Selection of the target sequence was based on two criteria. First, the adjacent 14-bp, 7-bp from both detector probes around the ligation site, had to be unique against human cDNA (GRCh38) to minimize the likelihood of non-specific hybridization. Next, the unique sequences were ranked according to the distance from the 3'-end of the transcript. Routine genetic testing detectors were preferentially designed close to transcript's 3'-end to minimize the effect of possible RNA degradation caused by sampling and handling if poly-A at the mRNA 3'-end is used for cDNA priming. Additionally, detector-specific regions were filtered by GC-content to determine the optimal melting temperature. The overall GC-content of a probe had to be between 40–60%, and the GC-content of the adjacent ends (4-bp) was up to 50%. Additionally, detector oligonucleotides with inter- or intra-complementarity issues were excluded from the selection. Although mRNA's 3'-ends were targeted in this study, the software has an option to design TAC-seq detectors close to the transcript's 5'-end, if required. The ERCC spike-in 22 detectors were designed based on the above description close to their poly-A tails.

1 For the TAC-seq miRNA assay, 49 miRNAs showing stable expression values (standard  
2 deviation/mean count per million (CPM) <0.5) within a study group were chosen according to  
3 previously published small RNA sequencing data.<sup>19</sup> One specific 20–24-bp detector oligonucleotide  
4 was designed per each selected miRNA ('Specific detector' in Supplementary Fig. 6). Eight UMI  
5 nucleotides and a common sequence were added to each specific detector probe. The right detector  
6 oligonucleotide is universal for all miRNAs, consisting of two common sequences and a 5' phosphate  
7 to enable ligation.

8 Chromosome 2 and 21 loci were selected from the k-mer <http://bioinfo.ut.ee/NIPTMer/programs/lists/>  
9 database (converted to text files with glistquery <http://bioinfo.ut.ee/NIPTMer/programs/glistquery>  
10 where k-mers overlapping known polymorphisms (dbSNP build ID 149) were first removed and the  
11 remaining candidates were used as an input for BLAST 2.4.0+ (task blastn) with database version  
12 GRCh38 (GCA\_000001405.15). All reads with more than one exact match were removed, following  
13 the concatenation of overlapping regions. The regions were converted to sequences with UCSC  
14 Genome Browser Gateway. Altogether, 114 specific detector pairs over the studied chromosomes 2  
15 and 21 were selected according to the above-described design, ensuring equal coverage over the entire  
16 chromosome.

17

### 18 **ERCC mRNA library preparation**

19 Non-skirted low profile PCR Strip Tube Plates (Thermo Fisher) were used with domed cap strips  
20 (Thermo Fisher). ERCC Spike-In Mix 1 (Life Technologies) was first diluted 10× and then  
21 additionally 100× with water. Aliquots, each containing 1.3 µl of 1,000× dilution, were stored at -70°C  
22 until use. Next, 199 µl of water was added to 1.3 µl aliquot and mixed. 1 µl of diluted ERCC spike-in  
23 content (Supplementary Table 1), serving as a template for each individual library was added to 2 µl of  
24 denaturation buffer, containing 5 mM Tris-HCl (pH 7.0) (Sigma-Aldrich), 1 mM dNTP mixture  
25 (Thermo Fisher), 400 nM Oligo-T30 primer and 0.05% Triton X-100 (Sigma-Aldrich). Reaction was  
26 mixed by pipetting and centrifuged briefly. RNA was denatured by 1 min at 80°C and immediately  
27 placed on ice. After that, reverse transcriptase (RT) master mix containing 100 mM Tris-HCl (pH 8.5)  
28 (Sigma-Aldrich), 2.5 M betaine (Sigma-Aldrich), 150 mM KCl (Sigma-Aldrich), 10 mM DTT

1 (Sigma-Aldrich), 15 mM MgCl<sub>2</sub> (Sigma-Aldrich), 4 U RiboLock RNase inhibitor (Thermo Fisher) and  
2 20 U Maxima H Minus Reverse Transcriptase (Thermo Fisher) was prepared. The master mix was  
3 vortexed and briefly centrifuged. 2 µl of RT master mix was added to previously denatured RNA (3  
4 µl). All RT pipetting steps were performed on ice. cDNA synthesis was performed by 30 min at 42°C,  
5 following 5 min at 85°C for RT inactivation.

6 Twenty two TAC-seq detector pairs targeting ERCC spike-in molecules were previously mixed  
7 together from 100 µM stock solutions, creating a '100 µM' oligo pool. The oligo mixture was diluted  
8 to 5 µM by water and stored at -20°C. Once cDNA synthesis was completed, 1 µl of 5 µM TAC-seq  
9 detector mixture was added to RT mixture. The content was mixed on vortex and centrifuged briefly.

10 Strip tubes were placed on thermocycler, cDNA denatured for 1 min at 98°C, followed by 1 h at 60°C  
11 to enable specific cDNA and TAC-seq probe hybridization. After hybridization, thermostable ligase  
12 reaction mixture was added. To keep a constant hybridization temperature (60°C), the cycler lid was  
13 opened and strip caps were removed. 5 µl of Taq DNA ligase master mix, containing 2× Taq DNA  
14 ligation buffer (New England Biolabs, NEB) and 1 U Taq DNA ligase (NEB) were added to each  
15 individual reaction tube and mixed by pipetting. The strip tubes were not removed from 60°C  
16 thermocycler to avoid self- and mispairing of TAC-seq probes. Ligation reaction was stopped after 20  
17 min incubation by placing the reaction tubes on ice.

18 15 µl of mixture consisting of Dynabeads MyOne Carboxylic Acid beads (2 µl) (Thermo Fisher) and  
19 13 µl of capture buffer (30% PEG-6000, 2 M NaCl, 5 mM Tris-HCl (pH 7.5), 10 mM EDTA and  
20 0.02% Tween-20 (all chemicals from Sigma-Aldrich)) was added to ice-cooled ligated sample. The  
21 content was mixed by vortex. Capture was carried out for 10 min at room temperature. After that the  
22 tubes were placed on DynaMag-96 Side Magnet (Thermo Fisher) holding 8-well strip tubes on  
23 VersiPlate Frame (Thermo Fisher). Supernatant was removed after 3 min incubation on the magnet.  
24 The beads on magnet were washed once with 50 µl of fresh 80% ethanol. Ethanol was removed by  
25 pipetting, and the clean pellet, without ethanol drops, was dried for 2 min. Once beads were dry, strip  
26 tubes were removed from the magnet and 18 µl of PCR master mix was added directly to the beads.

27 We have also successfully performed magnetic bead capture prior PCR without ethanol washing to  
28 avoid the risk of over-drying the bead. In the latter case, the supernatant should be removed

1 completely. PCR master mix contained 1× proofreading HOT FIREPol Blend Master Mix (Solis  
2 BioDyne, Tartu, Estonia) and 250 nM TAC-seq left primer. In addition to universal TAC-seq left, 16  
3 different TAC-seq barcoded oligonucleotides were used to introduce a 6-bp barcode to each studied  
4 sample (Supplementary Table 3). For that, 2 µl of 5 µM TAC-seq barcoded 1–16 primers were added  
5 individually to each PCR reaction. Strip tubes were closed with clean domed caps, mixed on vortex  
6 until beads were completely re-suspended. The ERCC spike-in reaction was incubated at 95°C for 12  
7 min, followed by two cycles of 95°C for 20 s, 57°C for 60 s and 72°C for 20 s. In addition, 16 cycles  
8 of 95°C for 20 s, 65°C for 20 s and 72°C for 20 s with a final extension at 72°C for 1 min using the  
9 default ramp speed of the T100 cycler (Bio-Rad) were performed. PCR products were pooled together  
10 into 1.5 ml tube. The tube with pooled sample was placed on magnet to remove carboxylated beads  
11 before the following column purification. Clear supernatant was purified with DNA Clean &  
12 Concentrator-5 column (Zymo Research) and eluted with 50 µl of elution buffer (EB). The library was  
13 size-selected using AMPure XP beads (Beckman Coulter) in a single-step selection to reduce 81 bp  
14 linear PCR double-stranded by-product (Supplementary Fig. 1). 50 µl beads were added to 50 µl of the  
15 purified PCR product, incubated for 5 min at room temperature and captured by a magnet for 3 min.  
16 After incubation on magnet, the supernatant was discarded and the remaining beads were centrifuged  
17 at 500×g for 10 s. After centrifugation, the beads were placed again on the magnet and all remaining  
18 supernatant was removed. The beads were eluted directly without ethanol washing in 25 µl of EB and  
19 incubated for 1 min at room temperature. AMPure XP bead elution has almost 100% efficiency even  
20 without previous ethanol wash. Finally, the eluted library was transferred to a clean tube after 1 min  
21 incubation on the magnet. The 180 bp library (Supplementary Fig. 1a-d) was visualized on a  
22 TapeStation High Sensitivity D1000 ScreenTape (Agilent Technologies) and quantified using KAPA  
23 Library Quantification Kit (Roche).

24

### 25 **Clinical sample mRNA library preparation**

26 mRNA biomarker libraries for endometrial receptivity testing were prepared as described above with  
27 the following modifications. Total-RNA samples with RIN values 7.7–9.6 (quantified by Qubit  
28 (Invitrogen)) were diluted to concentration of 90 ng/µl and 1 µl of this was used for library

1 preparation. RT master mix contained 1  $\mu$ l of 1:50,000 of ERCC RNA Spike-In Mix 1 (Life  
2 Technologies) dilution for technical normalization. Altogether 64-plex TAC-seq probe set, containing  
3 57 biomarker genes<sup>19</sup> and seven ERCC spike-ins (ERCC-00085; 00170; 00019; 00131; 00092; 00108  
4 and 00004) were used to generate a library for high-coverage analysis. The low-coverage analysis was  
5 performed using 70-plex, containing 57 biomarker genes,<sup>19</sup> five ERCC spike-ins (00131; 00108;  
6 00092; 00019 and 00004) and eight housekeeping genes (*ACTB*, *GAPDH*, *YWHAZ*, *PPIA*, *CYCI*,  
7 *HMBS*, *TBP* and *SDHA*). 5  $\mu$ M detector oligonucleotide mixtures from 100  $\mu$ M stocks were created as  
8 described above. PCR was performed using in total 12 cycles, following 2+10 principle (described in  
9 details above) for both high- and low-coverage libraries.

10

### 11 **microRNA library preparation**

12 miRNA profiles were analysed from endometrial total-RNA. 3' ligation was carried out overnight in 5  
13  $\mu$ l volume. The reaction contained 100 ng of total-RNA, 1 $\times$  RNA T4 RNA Ligase Reaction Buffer  
14 (NEB), 20 U RNase inhibitor (Thermo Fisher), 10% PEG-8000 (NEB), 100 nM adenylated 3' linker  
15 and 40 U T4 RNA ligase 2 (truncated, NEB). After ligation, the free ligation adapter was removed by  
16 adding 0.5  $\mu$ l 5'-Deadenylase (25 U/ $\mu$ l, NEB) and 0.5  $\mu$ l Lambda exonuclease (5 U/ $\mu$ l, NEB) and  
17 incubated 10 min at 37°C, followed by 10 min at 75°C. cDNA was synthesized after adding 0.4  $\mu$ l 100  
18 mM DTT (Invitrogen), 0.4  $\mu$ l 2 M KCl (Sigma-Aldrich), 0.4  $\mu$ l 10 mM dNTPs (Thermo Fisher), 0.4  $\mu$ l  
19 RNase inhibitor (Thermo Fisher), 0.2  $\mu$ l 10  $\mu$ M micro RT biotin primer and 0.2  $\mu$ l Maxima H Minus  
20 Reverse Transcriptase (200 U/ $\mu$ l, Thermo Fisher) which were mixed into one 2  $\mu$ l master mix. cDNA  
21 incubation was carried out for 15 min at 50°C, followed by 5 min at 80°C. Unbound primers were  
22 removed by adding 1  $\mu$ l Exonuclease I (20 U/ $\mu$ l, Thermo Fisher) and incubating for 10 min at 37°C  
23 and 5 min at 95°C. 1  $\mu$ l of 5  $\mu$ M TAC-seq detector mixture, containing miRNA-specific left detectors  
24 and miRNA universal 5' phosphorylated detector oligonucleotide (Supplementary Fig. 6), was added  
25 to previous 9  $\mu$ l product and incubated first for 2 min at 98°C to denature the template and probes and  
26 then for 1 h at 60°C. After the hybridization, thermostable ligase reaction mixture was added on  
27 thermocycler, keeping a constant (60°C) hybridization temperature. The cycler lid was opened and  
28 strip caps were removed. 5  $\mu$ l of Taq DNA ligase mixture, containing 2 $\times$  Taq DNA ligation buffer

1 (NEB) and 1 U Taq DNA ligase (NEB) was added to each individual reaction tube and mixed by  
2 pipetting. Ligation was stopped after 20 min incubation by placing reaction tubes on ice. 3  $\mu$ l of  
3 Dynabeads MyOne Streptavidin C1 beads (Invitrogen) were washed according to protocol and  
4 suspended in 15  $\mu$ l recommended B&W buffer. The beads were added to ligated product on ice, mixed  
5 well by pipetting and incubated for 10 min at room temperature. After capturing the beads on magnet  
6 for 1 min, the supernatant was removed and the beads were washed once with B&W buffer. TAC-seq  
7 ligated detectors were amplified as described above using 2+18 cycles of PCR. The designed miRNA  
8 library is 170 bp (Supplementary Fig. 1e).

9

### 10 **Cell-free DNA library preparation**

11 10 ng of acoustically sheared (Covaris) cell-free-like genomic DNAs were combined to create excess  
12 rates of chr21 above euploid level, mimicking the extra 5–30% of fetal cfDNA fractions. 100%  
13 fraction is the GM04616 cell line's DNA with trisomy 21. Each concentration was performed as  
14 duplicate. Samples were pipetted into strip tubes, adding 1  $\mu$ l of 5  $\mu$ M TAC-seq detector  
15 oligonucleotide mixture and 1  $\mu$ l 10 $\times$  hybridization buffer, containing 100 mM Tris-HCl (pH 7.5), 500  
16 mM KCl, 0.2% Tween-20 and 0.1 mM EDTA. The final hybridization volume was 12  $\mu$ l. The content  
17 was mixed by vortexing and centrifuged briefly. Strip tubes were placed on thermocycler, mixture  
18 denatured for 2 min at 98°C, followed by 2 h at 60°C for hybridization. After hybridization,  
19 thermostable ligase reaction master mix was added on thermocycler, keeping constant (60°C)  
20 hybridization temperature. Subsequently, 2.5  $\mu$ l of Taq DNA ligase master mix, containing 1.5  $\mu$ l 10 $\times$   
21 Taq DNA ligation buffer (NEB) and 1 U Taq DNA ligase (NEB) was added to each individual  
22 reaction tube and mixed by pipetting. Ligation reaction was stopped after 20 min incubation by  
23 placing reaction tubes on ice. 25  $\mu$ l of previously combined Dynabeads MyOne Carboxylic Acid beads  
24 (3  $\mu$ l) (Thermo Fisher) and 22  $\mu$ l of capture buffer as described above was used for capture in this  
25 assay. Ligated TAC-seq detectors were amplified as above described using 2+19 PCR cycles.

26

## 1 **MicroRNA spike-in preparation**

2 Custom miRNA spike-in was prepared with PCR using 76 bp synthetic ‘miRNA spike-in’  
3 oligonucleotide, ‘TAC-seq left’ and ‘miRNA spike-in right primer’ (Supplementary Table 3). PCR  
4 was carried out in 100 µl volume containing 20 µl HOT FIREPol Blend Master Mix (Solis BioDyne),  
5 1 µl 100 nM miRNA spike-in DNA oligonucleotide as a template, 1 µl 100 µM TAC-seq left and  
6 miRNA spike-in right primers. The reaction tube was incubated at 95°C for 12 min, followed by two  
7 cycles of 95°C for 20 s, 57°C for 60 s and 72°C for 20 s. In addition, 8 cycles of 95°C for 20 s, 65°C  
8 for 20 s and 72°C for 20 s with a final extension at 72°C for 1 min were used. The product was  
9 purified by column and quantified by KAPA Library Quantification Kit (Roche).

10

## 11 **Reference sequencing and data analysis**

12 Total-RNA samples with concentration at least 200 ng/µl and RIN >8 were used for endometrial  
13 receptivity cDNA library construction. Libraries were generated from ~1 µg of total-RNA using  
14 TruSeq Stranded Total RNA (Illumina) protocol. Libraries were normalized, pooled and sequenced by  
15 Illumina HiSeq2500 instrument producing 100 cycles paired-end reads. The RNA-seq data was  
16 analyzed as previously described.<sup>19</sup> Heatmaps of the results were generated using the ‘pheatmap’  
17 package implemented in R. For plotting, CPM values provided by edgeR were log-transformed, using  
18 the transformation  $\log(\text{CPM}+1)$  to facilitate graphical presentation of the results.

19 Previously published small RNA sequencing data, containing the same RNA samples as in the miRNA  
20 TAC-seq experiments, was used. Briefly, libraries were constructed following a TruSeq Small RNA  
21 Library Preparation Guide (Illumina). 1 µg of small RNA fraction isolated from endometrial tissues  
22 was used as an input. Libraries were sequenced by Illumina HiSeq 2500 instrument producing 50 bp  
23 single-end reads. The RNA-seq data was analyzed as previously described.<sup>19</sup>

24 Sheared genomic DNA samples with concentration 5 ng/µl were used to generate cfDNA libraries as  
25 described elsewhere but using 12 cycles of PCR. Libraries were quantified by Qubit HS assay  
26 (Thermo Fisher), brought to the uniform concentration and pooled. The pooled library quality was  
27 estimated using a TapeStation High Sensitivity D1000 ScreenTape (Agilent Technologies) and  
28 sequenced by Illumina NextSeq 500 instrument producing 85 bp single-end reads. A previously

1 described method was used for the analysis including mapping of sequencing reads to the reference  
2 genome, calculating the coverage of each region in the genome, GC correction, calculating the mean  
3 and standard deviation of the reference population and the sample. Finally, risk for aneuploidy was  
4 estimated by calculating Z-score, as well as additional ZZ-score, BM (bin median) and OM (other  
5 median). Trisomy is called if Z-score is  $\geq 3$ , ZZ-score is  $\geq 3$ , BM is  $\geq 1.5$  and OM is  $< 1$   
6 (Supplementary Fig. 9).

7

### 8 **TAC-seq sequencing**

9 The ERCC spike-in library was sequenced by Illumina NextSeq 500 high output 75 cycles kit using 2  
10 pM library concentration. The library was sequenced using 90-bp single-read protocol that was primed  
11 by Illumina Read1 (HP10) primer. The entire construct was 90-bp. The second, high-coverage mRNA  
12 biomarker set was sequenced with configuration identical to the one described above. In both libraries,  
13 particularly in receptivity biomarker assay, 2-channel Illumina SBS technology caused reduced level  
14 of cluster quality due to a common 20-bp motif (an extremely low-diversity region) at construct 62–  
15 82-bp site (Supplementary Fig. 8a). 4-channel SBS was used with the same library and 90-bp read  
16 using MiSeq (Illumina) instrument (data not shown) without any improvement. Following custom  
17 barcode sequencing primer was designed and used for low-coverage mRNA biomarker assay,  
18 analyzed by MiSeq Reagent Kit v3 in 14 pM library concentration. Custom barcode primer avoided  
19 the low-diversity common region and significantly improved the outcome, increasing the chastity filter  
20 (pass-filter) per cent from previous 67% to 93% (Supplementary Fig. 8b-d). In total 62-bp Read1 and  
21 6-bp barcode (index) nucleotides were sequenced. miRNA library was sequenced by NextSeq 500  
22 high output 75 cycles kit and 2 pM library concentration using LNA custom barcode primer. The  
23 Read1 length was 32-bp plus 6-bp barcode. Cell-free DNA library was analyzed by NextSeq500  
24 instrument, using custom LNA barcode primer, 1.8 pM loading concentration, 62-bp for Read1 and 6-  
25 bp for barcode. The data have been deposited under GEO accession number GSE98386 and  
26 GSE110110 and SRP accession number SRP132266.

27



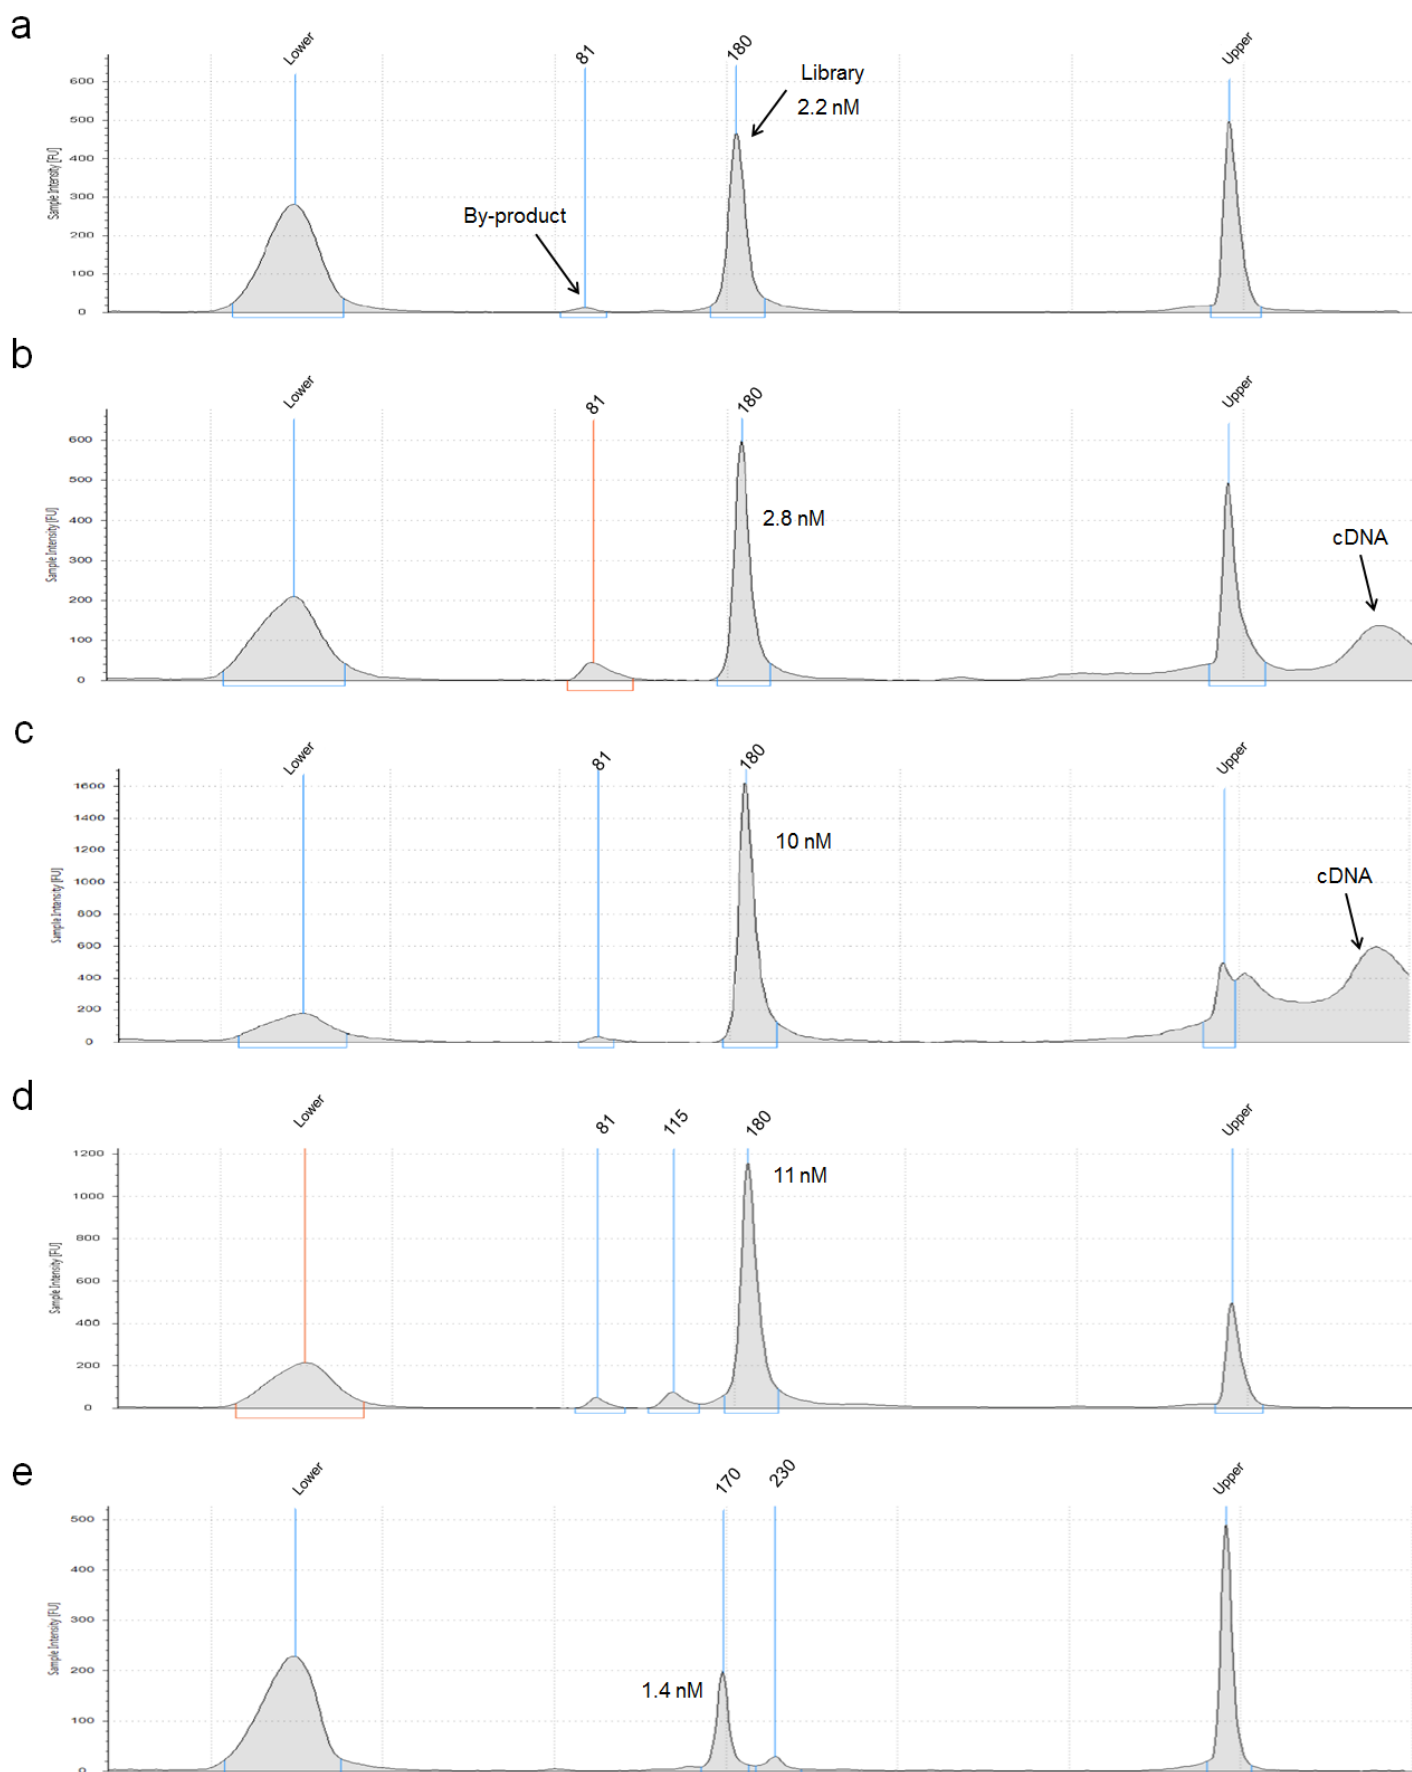

**Supplementary Fig. 1.** PCR amplified library quality control on gel. Each TapeStation D1000 High Sensitivity (Agilent) electropherogram represents a prepared and sequenced TAC-seq library. The libraries were created for (a) ERCC spike-in assay (180 bp), (b) high sequencing coverage mRNA assay for endometrial receptivity mRNA biomarkers (180 bp), (c) low sequencing coverage mRNA assay for endometrial receptivity mRNA biomarkers (180 bp), (d) cell-free DNA-based assay to detect chromosome copy-number, and (e) 49-plex endometrial miRNA assay (170 bp). 81 bp is the expected by-product, having only Illumina P7 common motif and providing no complete clusters on sequencing flow-cell. Low peak at 115 bp is a by-product generated by two PCR primers in a combination of right detector probe matching UMI motif and simultaneous contribution from specific part. The 115 bp by-product generates clusters on flow-cell and provides a read starting with the motif GGAGCTGTCTGCGACTTT(BARCODE). 230 bp band in the miRNA assay is a by-product with unknown origin. As TAC-seq is a single-tube assay, cDNA (>1500 bp) is carried from reverse transcriptase to final QC. cDNA does not affect sequencing outcome but is visible on both mRNA assays (b and c) and is easily removable by an additional bead-based purification step. The cDNA mass may affect library quantification. Here-presented library concentrations were measured by qPCR-based assay without influence from cDNA.

Illumina® sequencer instrument or BaseSpace environment

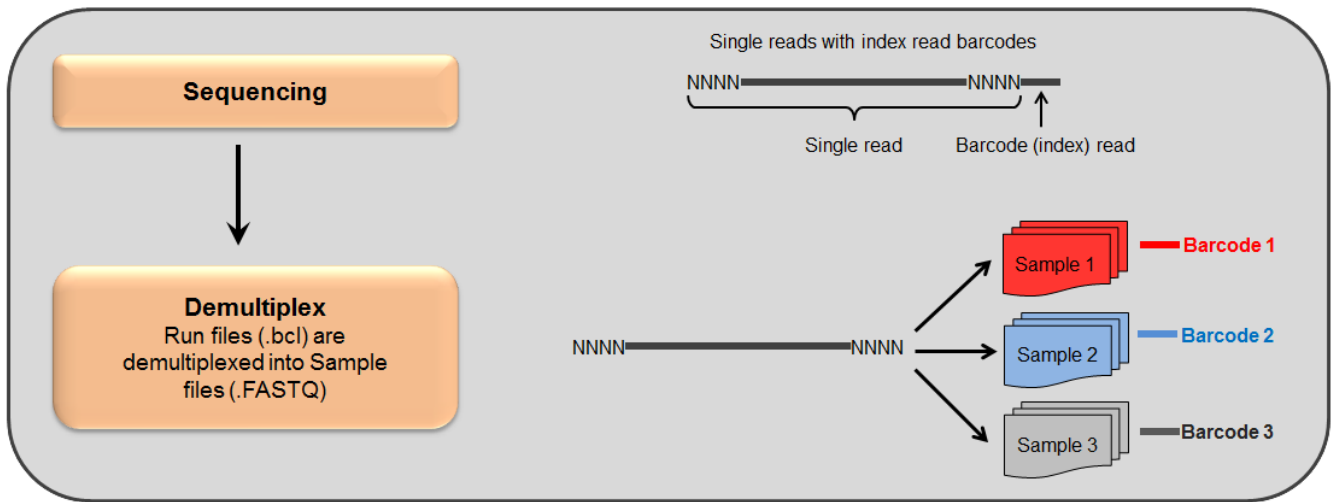

Personal computer (PC) or server  
(Supplementary Software)

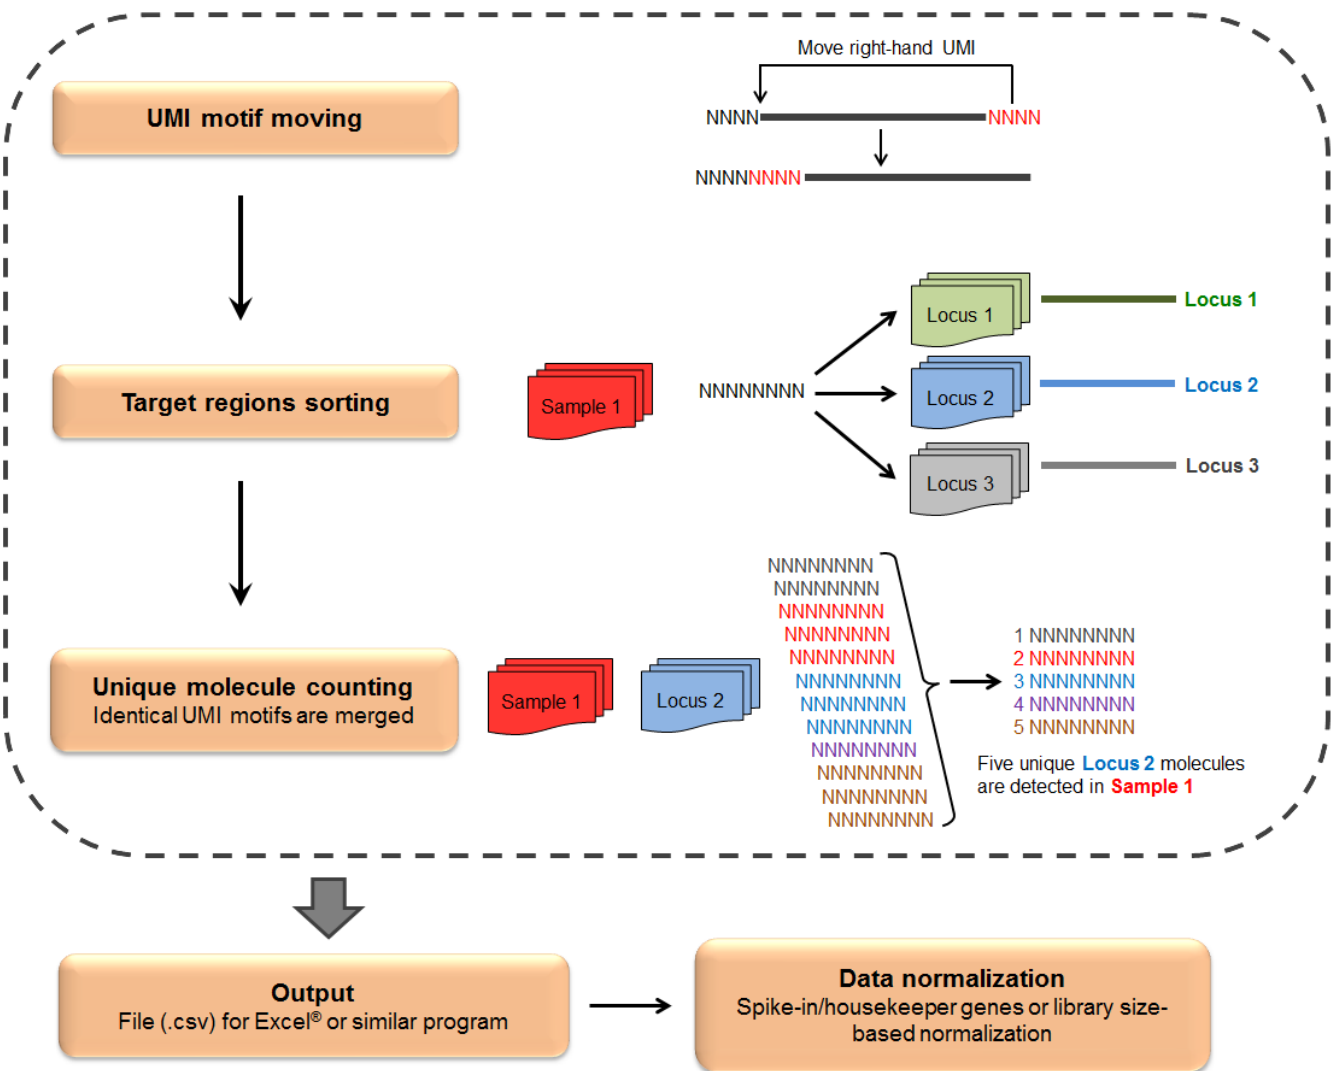

**Supplementary Fig. 2.** Overview of data analysis. Sequencing data are first quality filtered and sorted (demultiplexed) by Illumina® software based on Barcode (index) reads between analysed Samples (grey box). UMI motifs are joined, target regions are sorted between loci and PCR effect is reduced by merging of identical UMI motifs (dashed box). As TAC-seq data analysis does not need sequencing read mapping or similar resource-demanding computing, the manipulations can be performed in personal computer (PC) using open-source software from <https://github.com/cchtEE/TAC-seq-data-analysis>

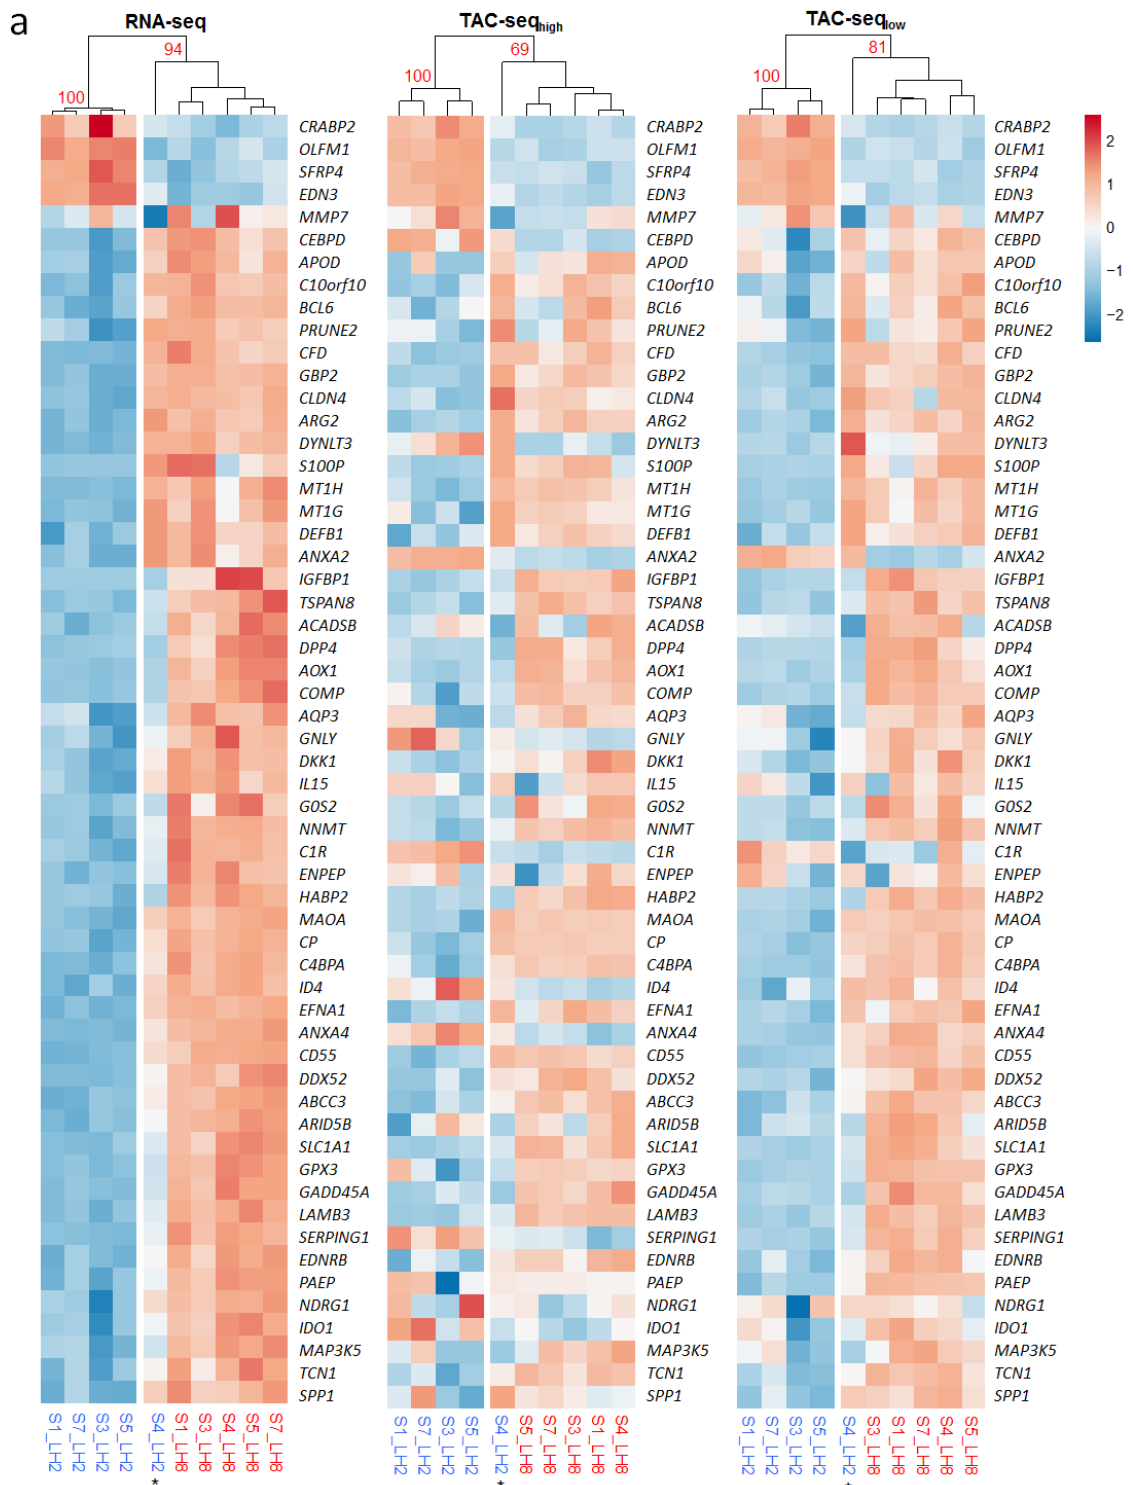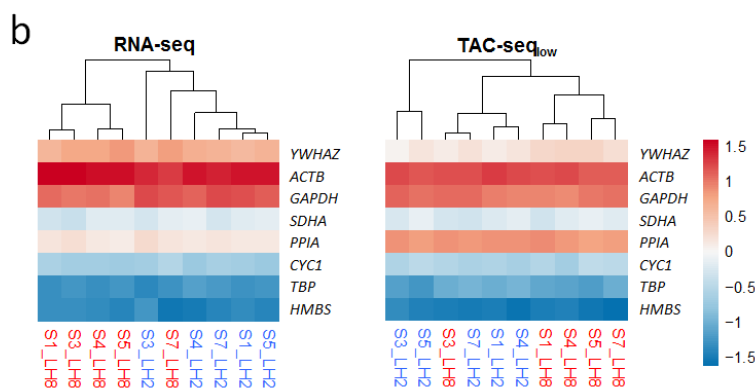

**Supplementary Fig. 3.** Clustering analysis of biomarker genes and housekeepers through RNA-seq and TAC-seq approaches. Clustering comparison of (a) 57 biomarker genes between full transcriptome RNA-seq (left), high sequencing coverage TAC-seq (middle) and low sequencing coverage TAC-seq (right). Five pre-receptive (blue, LH2 - luteinizing hormone peak detection time plus two days) human uterine endometrial samples were analysed together with five receptive endometrial (red, LH8 - LH peak detection time plus eight days) samples. The one pre-receptive sample (indicated with an asterisk) clusters together with receptive samples through all three comparisons. The data, analysed at UMI threshold 2 (UMI=2) is plotted as row-wise scaled log-transformed CPM values. The samples are hierarchically clustered column-wise using Pearson correlation and clustering probabilities are marked with red numbers. The genes are ordered row-wise by RNA-seq clustering results using Euclidean distance. (b) Heatmap clustering of eight housekeeping genes between RNA-seq (left) and low sequencing coverage TAC-seq (right) demonstrates non-fluctuating gene expression between pre-receptive and receptive samples.

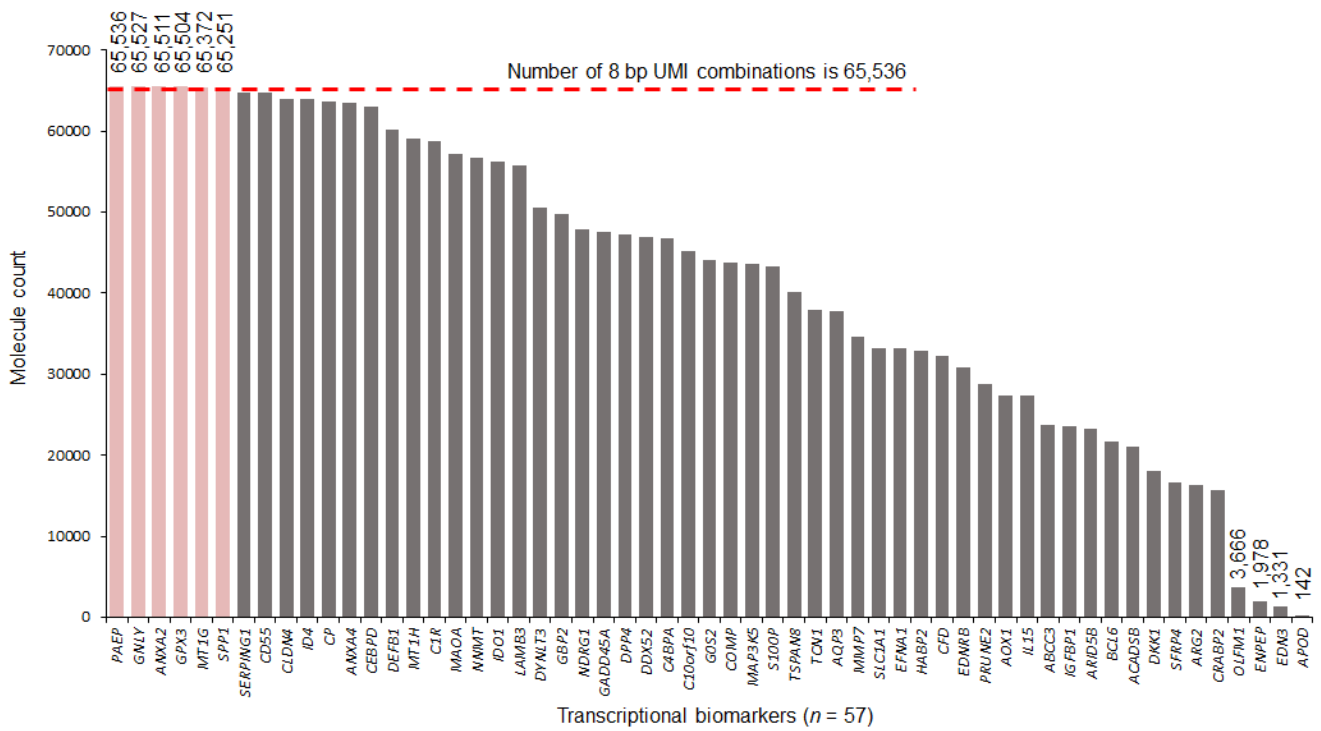

**Supplementary Fig. 4.** Unique molecule counts and UMI induced saturation. Molecule read count (Y-axis) of studied biomarker set after UMI correction. All analysed 57 transcripts (X-axis) were detected by sequencing and top six highly expressed genes were facing UMI-length restricted ‘technical’ saturation. Red dashed line presents the possible number of combinations (65,536) in case of 8-bp UMI.

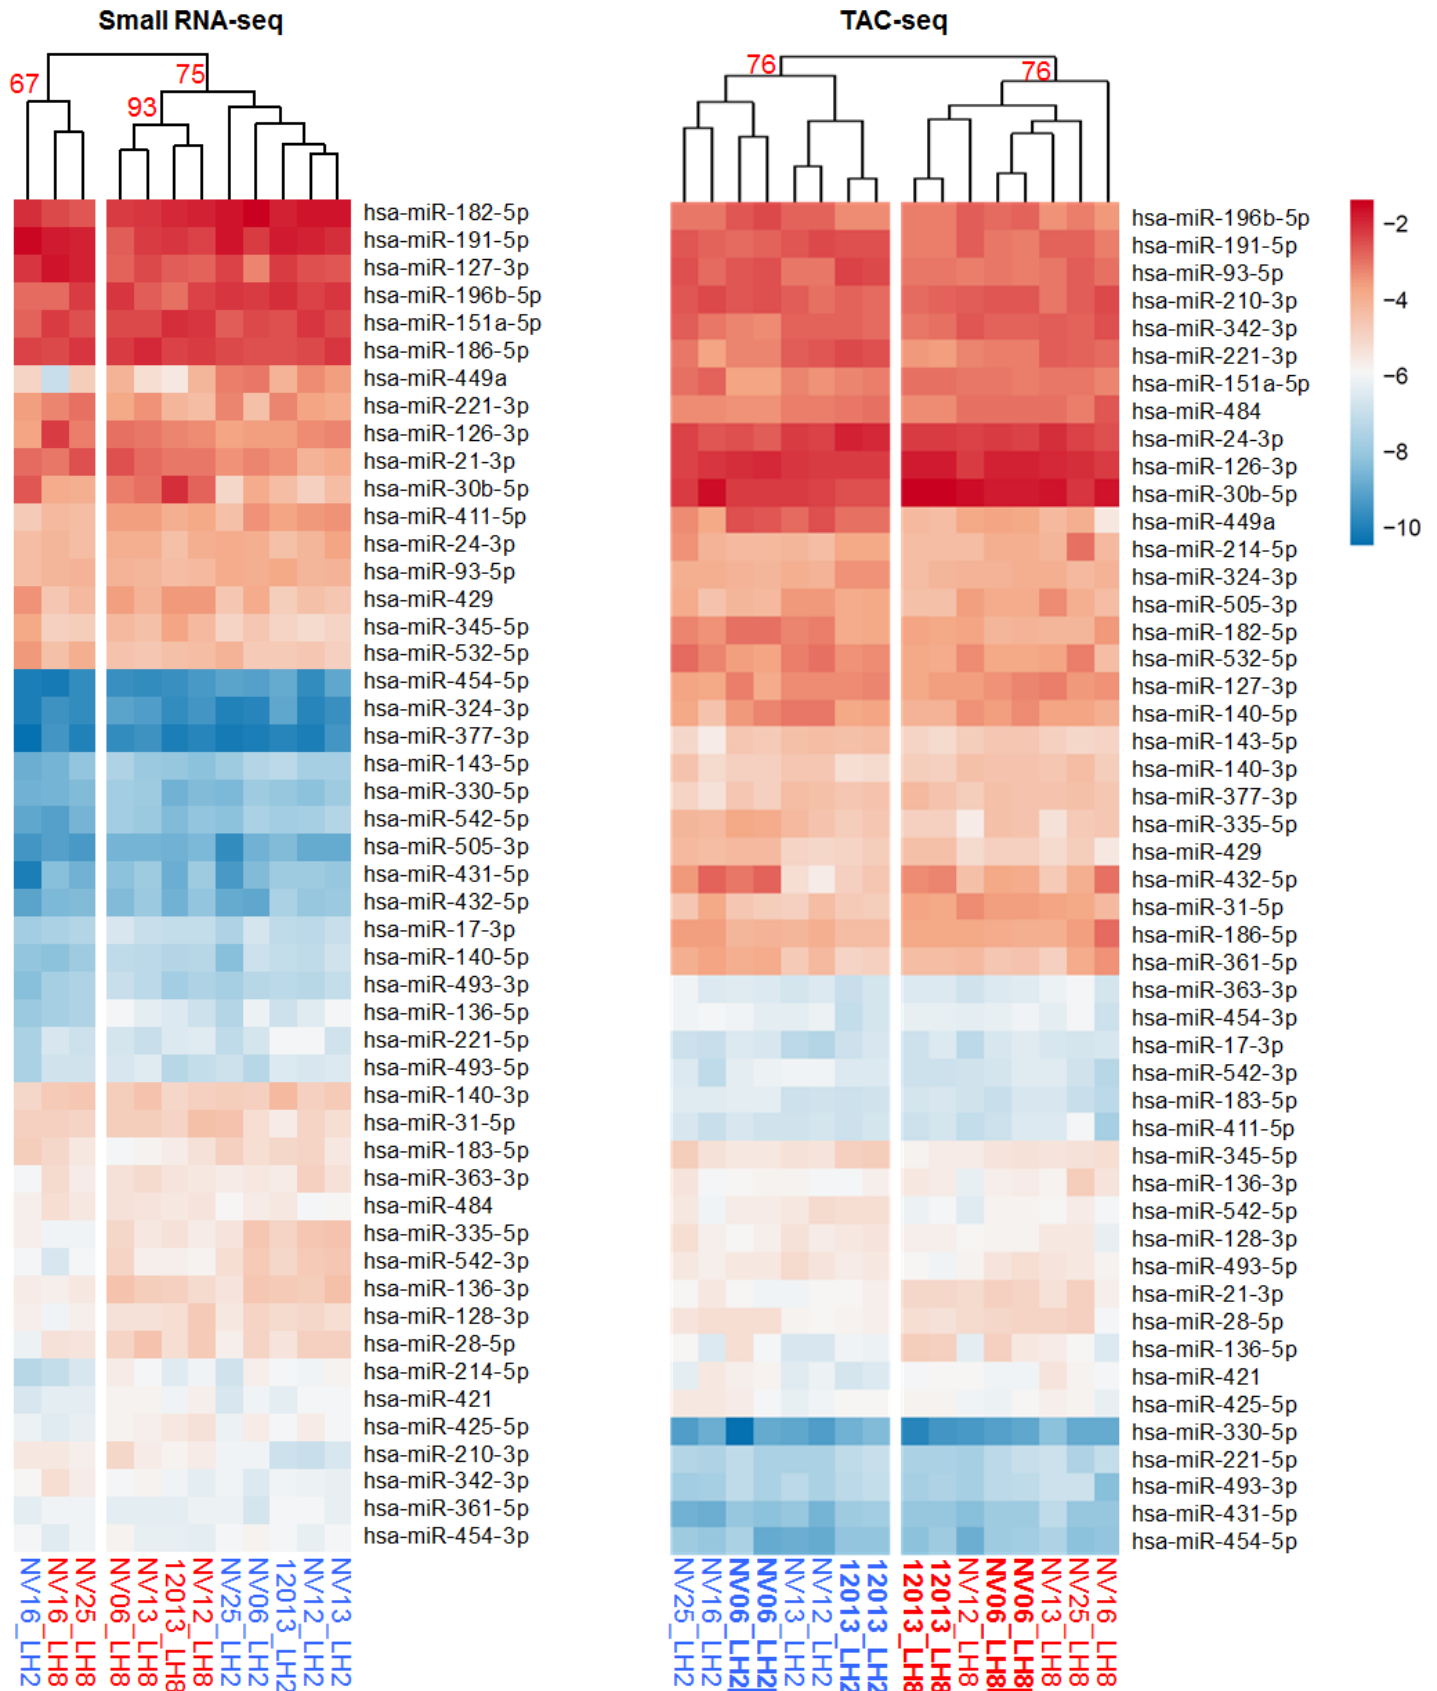

**Supplementary Fig. 5.** Clustering of miRNA profiles. Heatmaps of the small RNA-seq (left) and targeted miRNA TAC-seq (right). TAC-seq assay demonstrates the sensitivity to distinguish endometrial samples at pre-receptive (blue, LH2) and receptive (red, LH8) time points of the cycle. In total, two biopsies (LH2 and LH8) from six individuals, altogether 12 samples were analysed. Four samples were performed as technical replicates (in bold and underlined) in TAC-seq assay.

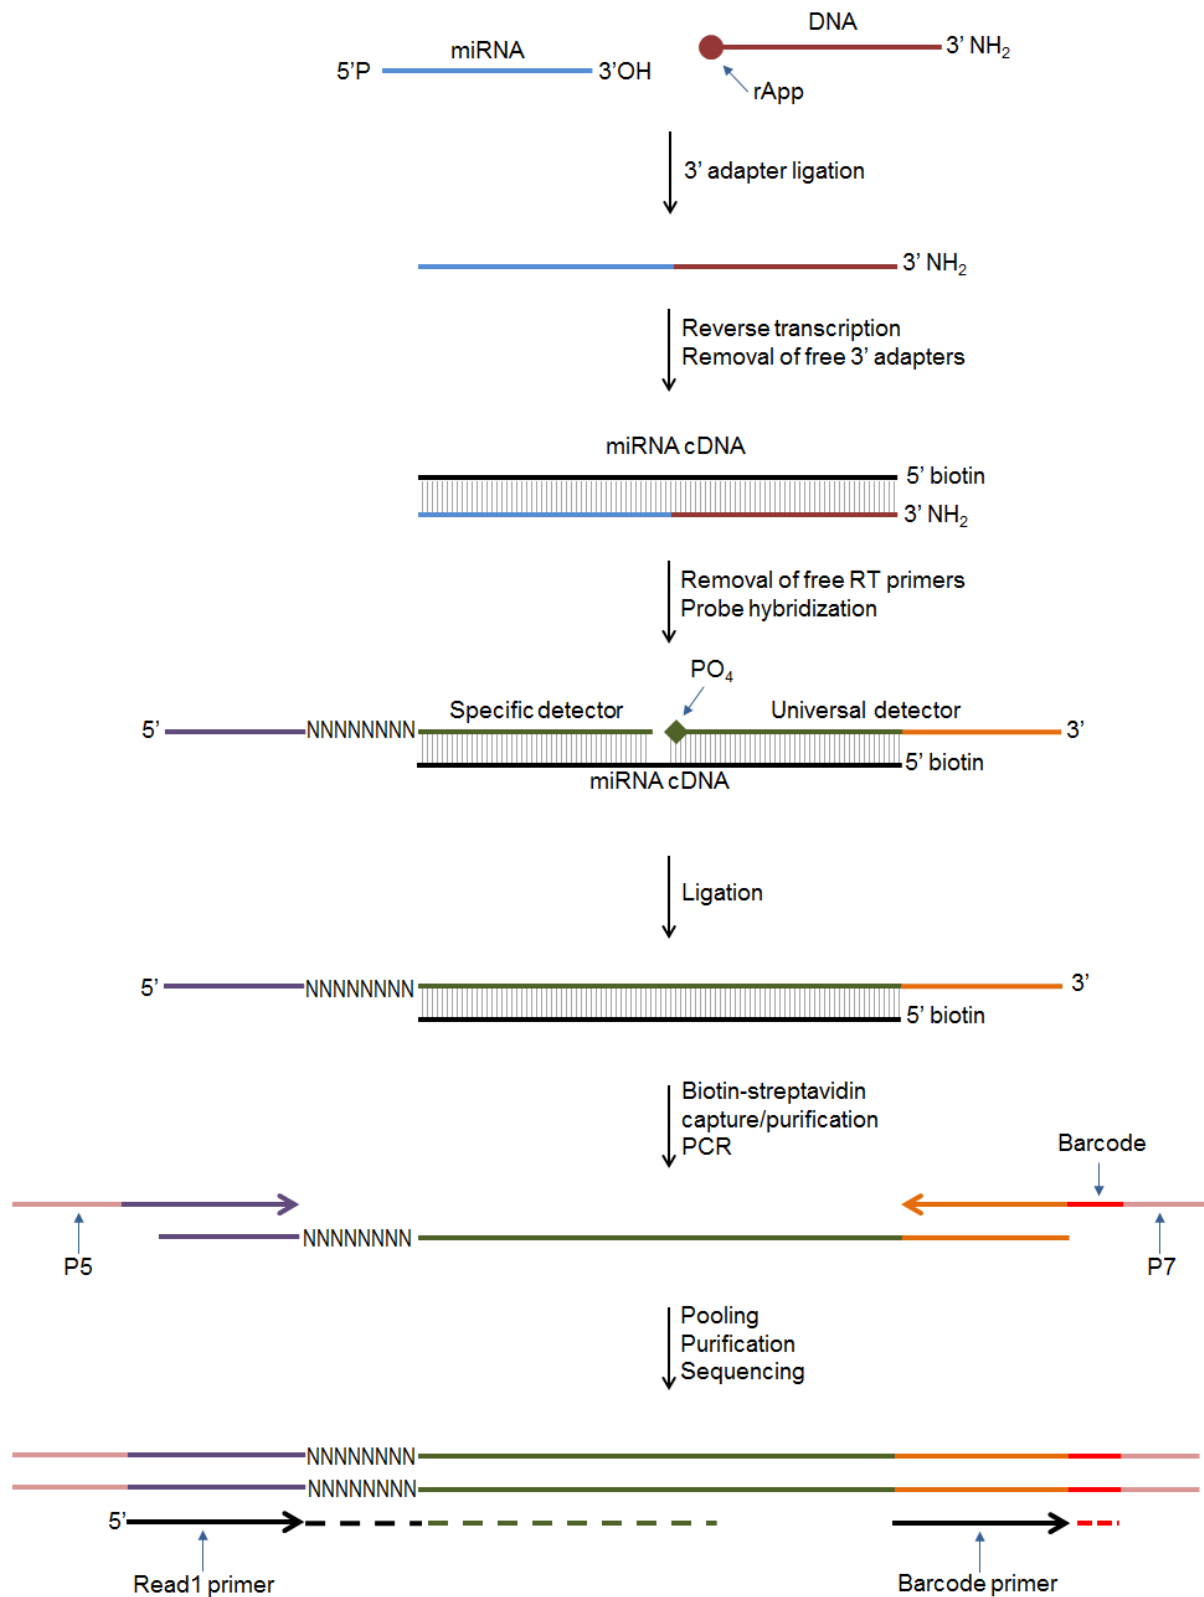

**Supplementary Fig. 6.** Schematic outline of miRNA TAC-seq library preparation. Total-RNA is introduced for 3' adapter ligation. Free adapters were removed enzymatically and cDNA synthesis was initiated by 5' biotinylated primer. Specific TAC-seq detector oligonucleotide hybridizing under stringent conditions on studied miRNA cDNA. Specific detector oligonucleotide has a 20-24 bp specific region in 3' end, eight base pair unique molecular identifier (UMI) motif and a common sequence (purple). The universal TAC-seq detector is 5' phosphorylated and supplied with a common sequence (orange). After thermostable ligation, the biotin enriched cDNA-detectors complex is captured by streptavidin magnetic beads. PCR is used to introduce individual barcodes and Illumina technology-compatible motifs like P5, P7 and complete H10 sequence for Read1 primer. Samples are pooled, purified and concentrated. The created library has a 170 nucleotide amplicon as shown in Supplementary Fig. 1e. A single 32 bp sequencing read is sufficient to analyse 8 bp UMI (black dashed line) and 24 bp miRNA sequence (green dashed line). Barcode is sequenced by independent custom LNA primer (Supplementary Table 3).



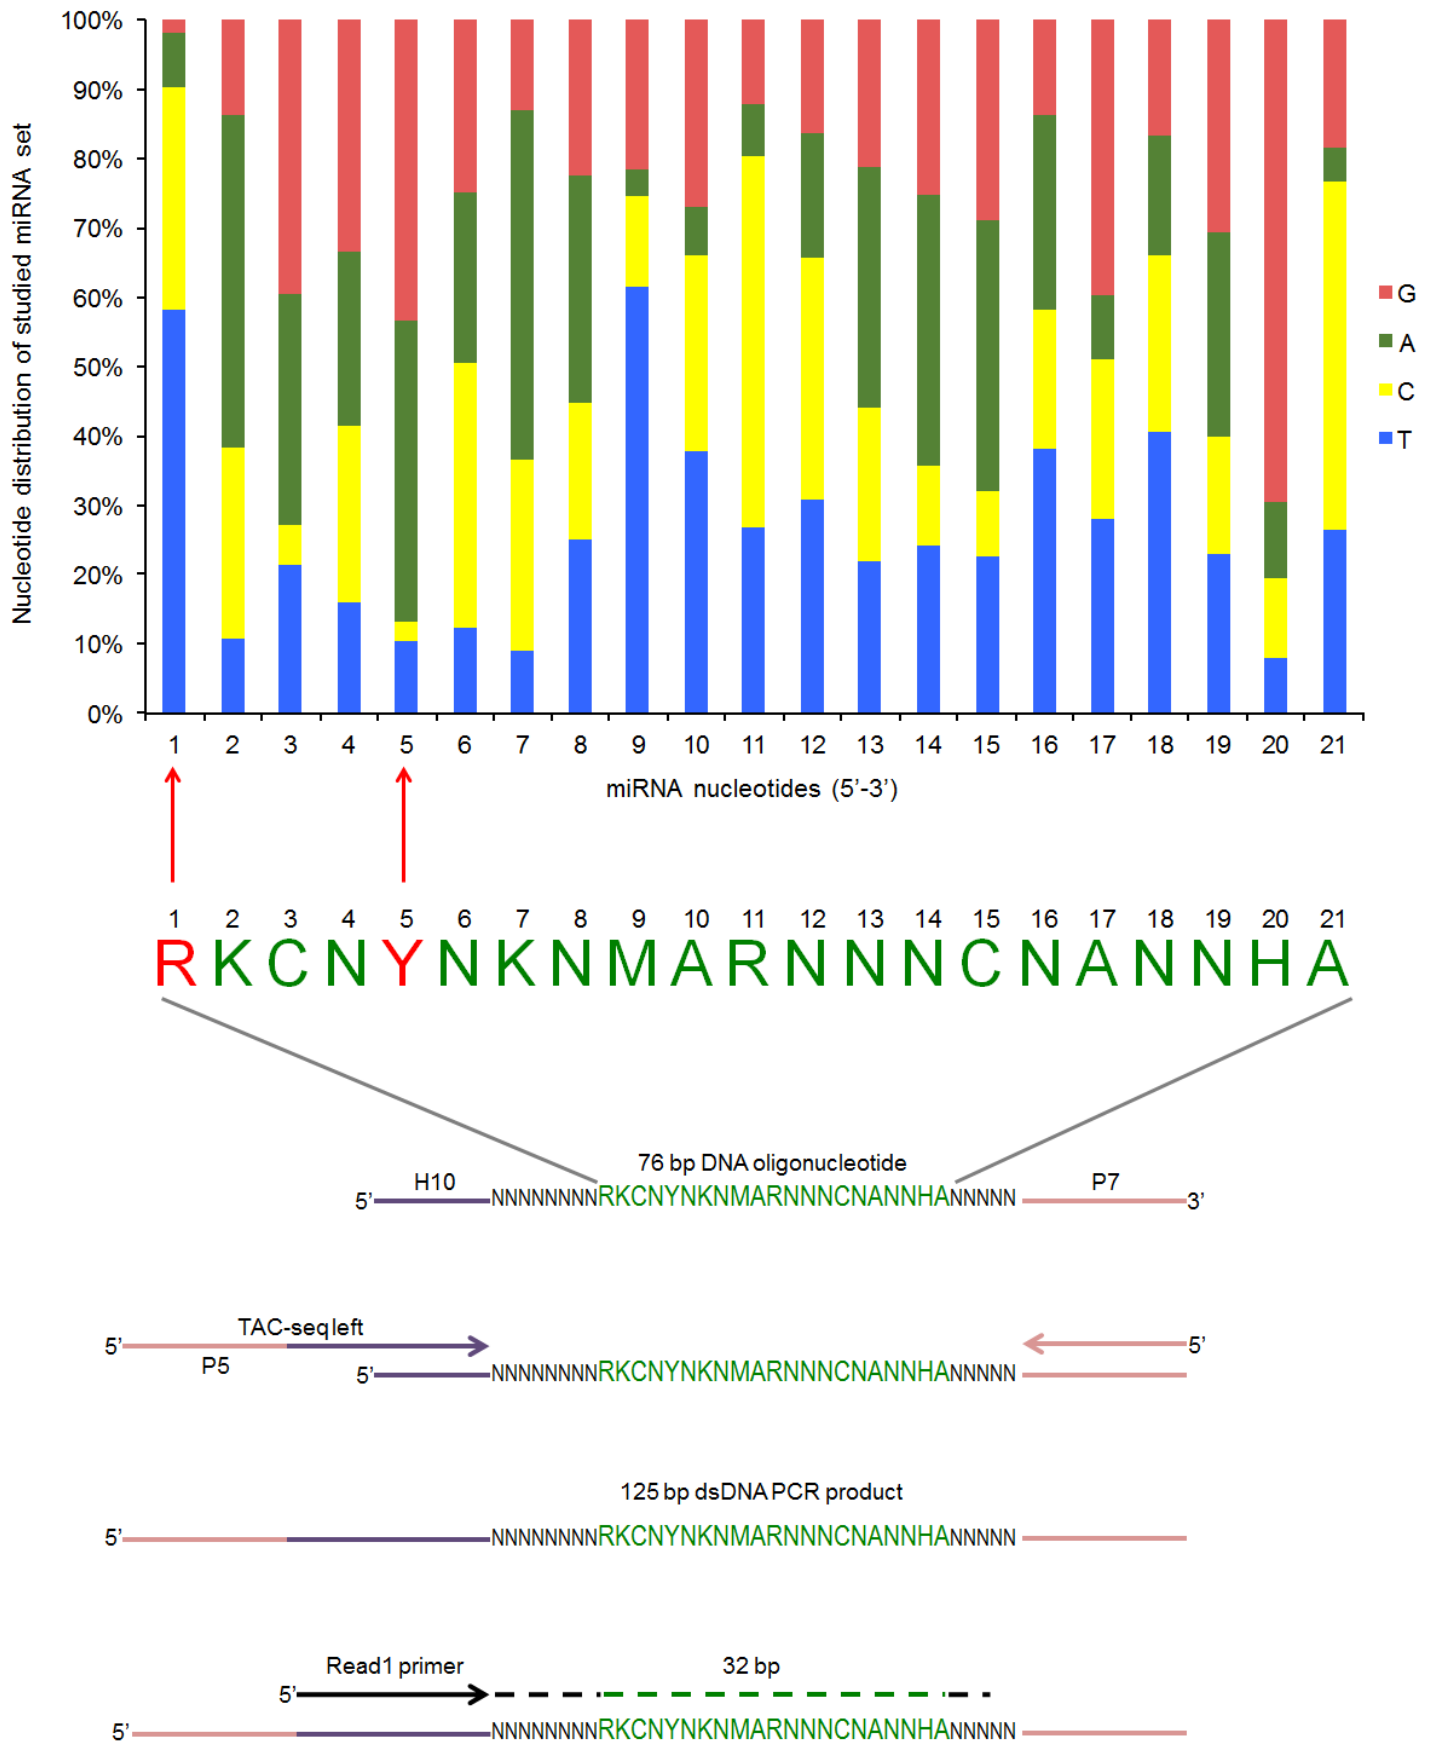

**Supplementary Fig. 7.** Pooled miRNA nucleotide distribution and the principle of miRNA specific spike-in. miRNA nucleotide distribution of this specific 49-plex set was calculated based on previous small RNA-seq data. Significant unbalance was predicted at positions one and five, and moderate unbalance over multiple sites. Green spike-in DNA sequence motif was designed to compensate low-presented nucleotides during sequencing. The specific green sequence was enriched with left universal sequence, eight-nucleotide UMI, four-nucleotide random nucleotides at right hand and another right-side universal sequence. The synthetic 76 bp DNA oligonucleotide was used as a template of low-cycle PCR, purified and quantified to 2 nM spike-in solution. The full sequence of „miRNA spike-in“ DNA oligonucleotide is in Supplementary Table 3 and its preparation is described in Supplementary Methods.

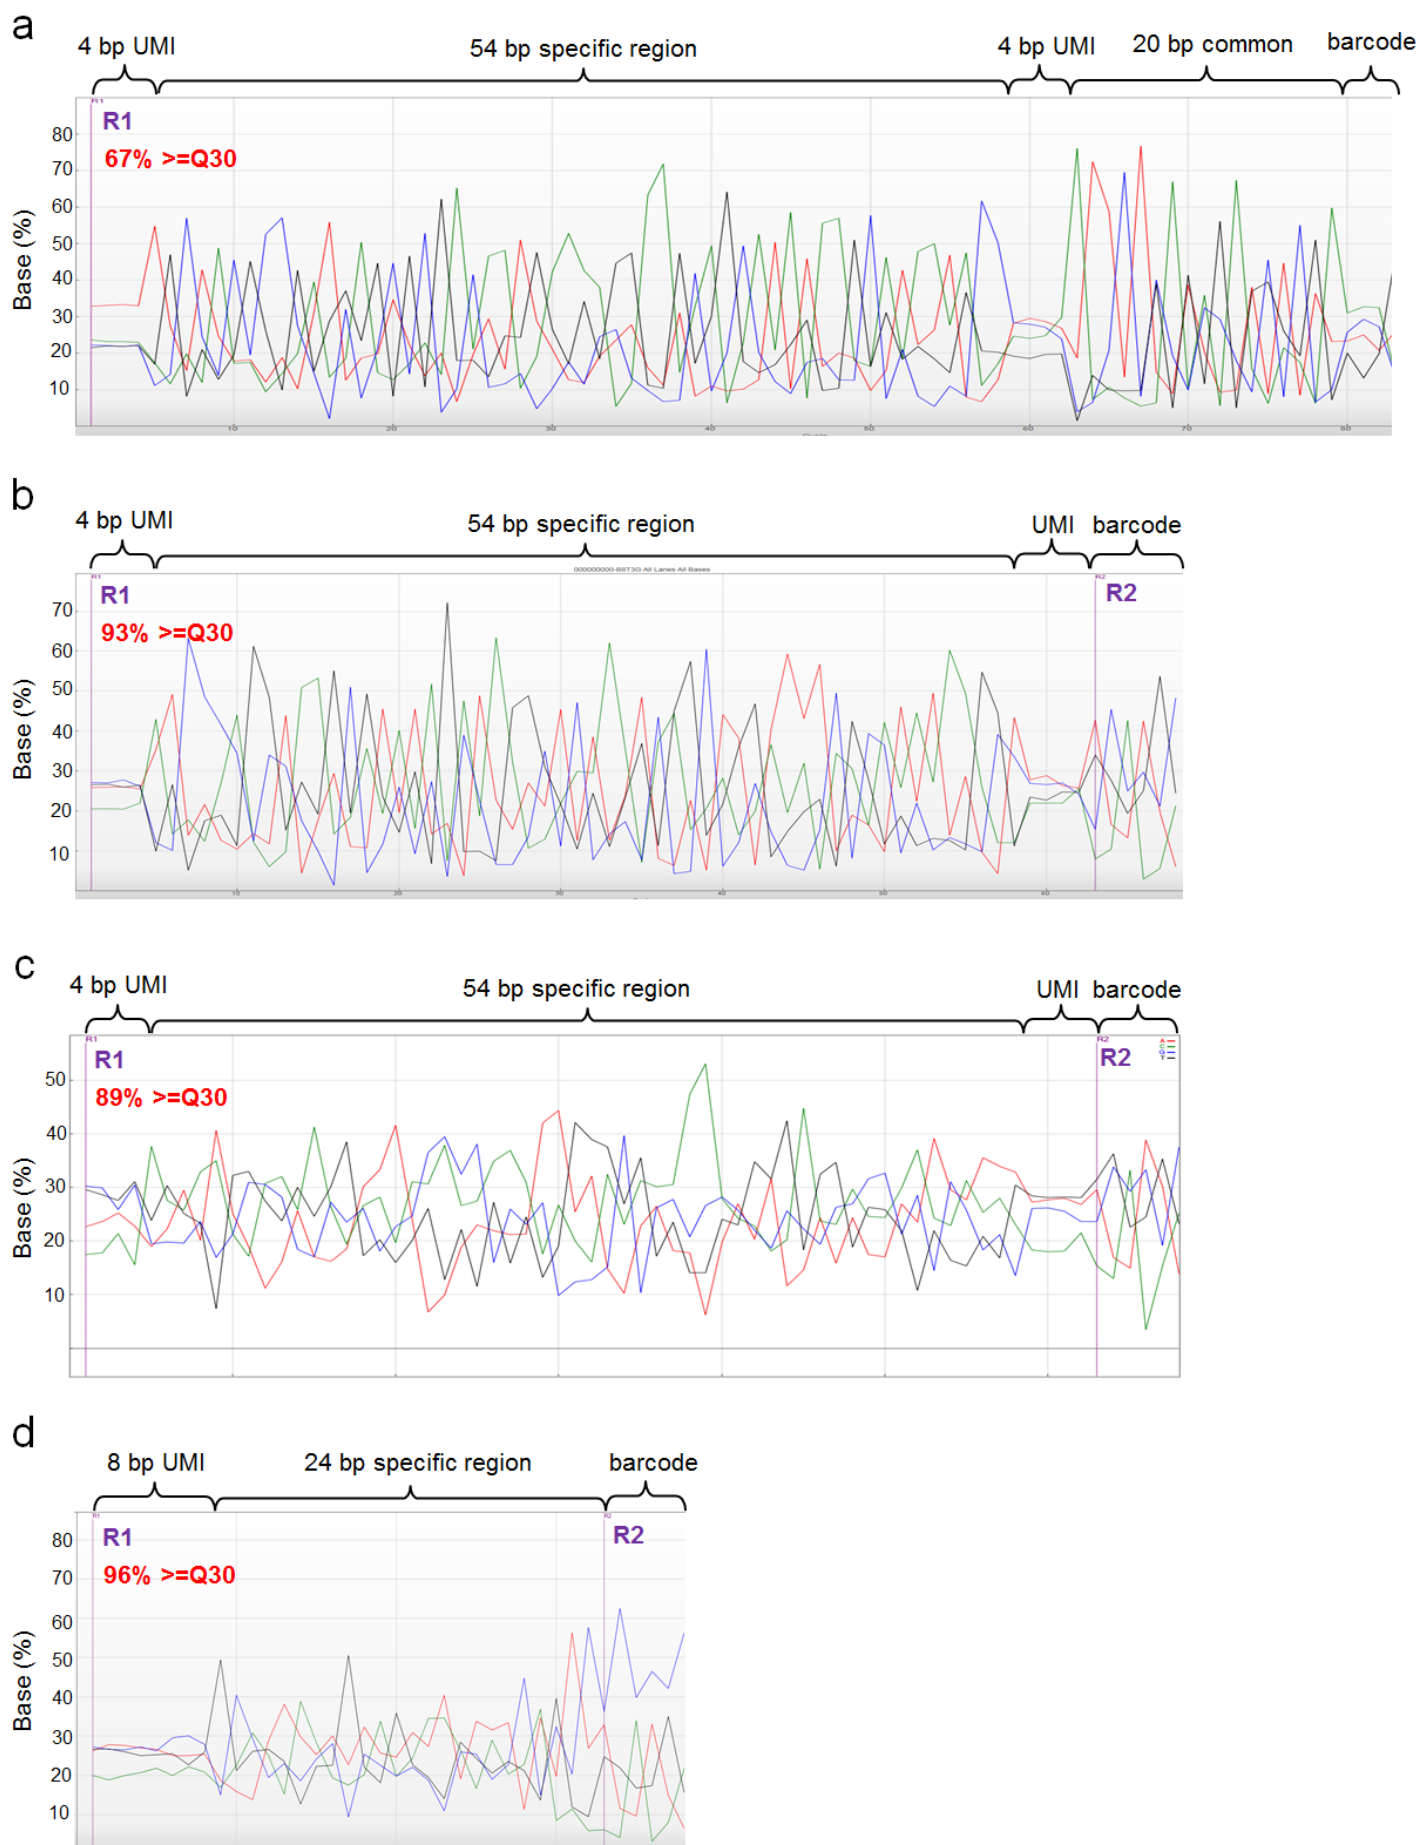

**Supplementary Fig. 8.** Library complexity through different TAC-seq assays. The plots show the percentage of clusters of which each base has been called through Read1 (R1) and barcode read (R2). (a) Endometrial mRNA library was sequenced with high-coverage using a long single-read, calling a 20 bp common motif that together with unbalanced Read1 caused the drop of Q30 score (67%). (b) Low sequencing coverage endometrium biomarker assay was sequenced using a custom LNA barcode primer that avoids the 20 bp common motif (it anneals on it) and increased the Q30 score to 93%. (c) Cell-free DNA trisomy 21 library was also sequenced with 62 bp single read and following 6 bp barcode primed by custom LNA barcode primer. Sequencing protocol with 62 bp Read1 and following custom barcode primer is optimal to ensure best quality reads. (d) miRNA reads started with eight UMI nucleotides and continued with a 24 bp specific region in Read1, followed by 6 barcode nucleotides by custom LNA barcode primer.



a

|                            | Trisomy factor (%) |         |           |           |         |         |           |           |
|----------------------------|--------------------|---------|-----------|-----------|---------|---------|-----------|-----------|
|                            | 0                  | 5       | 10        | 15        | 20      | 25      | 30        | 100       |
| Z                          | -4.2               | 4.8     | 43        | 13.2      | 18.2    | 22.7    | 24.4      | 62.1      |
| ZZ                         | -0.3               | 0.4     | 4.2       | 1.2       | 1.8     | 2.2     | 2.6       | 4.6       |
| BM                         | -2.9               | -1.2    | 8         | 1.2       | 2.9     | 3.1     | 4.4       | 12.4      |
| OM                         | 6.1                | 5.4     | 1.7       | 4.6       | 4.3     | 4       | 3.5       | 0.8       |
| PCR product concentration* | 13.1               | 12      | 9         | 8.9       | 12.5    | 9.8     | 9.8       | 9.2       |
| Ch2 reads                  | 991,648            | 835,726 | 4,063,932 | 1,046,881 | 870,644 | 922,930 | 1,081,705 | 1,595,939 |
| Ch21 reads                 | 213,037            | 181,753 | 1,006,146 | 234,883   | 195,814 | 211,642 | 251,082   | 406,915   |
| Ch2 average coverage**     | 0.348              | 0.293   | 1.426     | 0.367     | 0.306   | 0.324   | 0.380     | 0.560     |
| Ch21 average coverage**    | 0.388              | 0.331   | 1.831     | 0.427     | 0.356   | 0.385   | 0.457     | 0.740     |

\* Purified by AMPure XP beads and quantified by Qubit

\*\* 85 bp single-end reads

**ZZ** score is the standard score of the Z-score of a given autosome in comparison with the Z-scores of remaining autosome.

**BM** (bin median) is calculated from the median of Z-scores measured per 5 MB bin in the autosome of interest

**OM** (other median) is the median of the absolute value of the 5 Mb Z-scores over the remaining bins

b

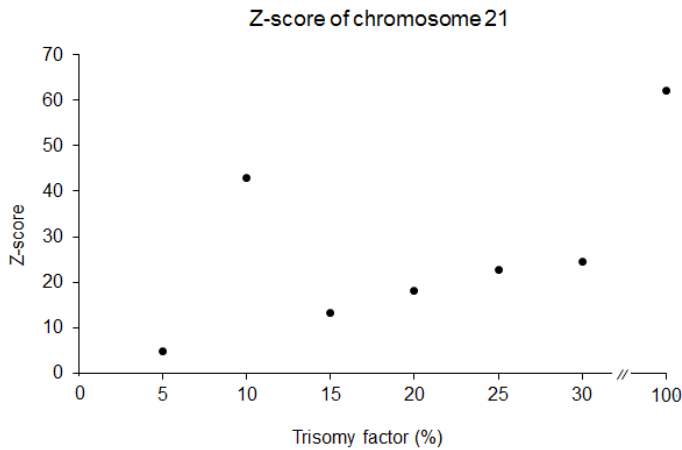

c

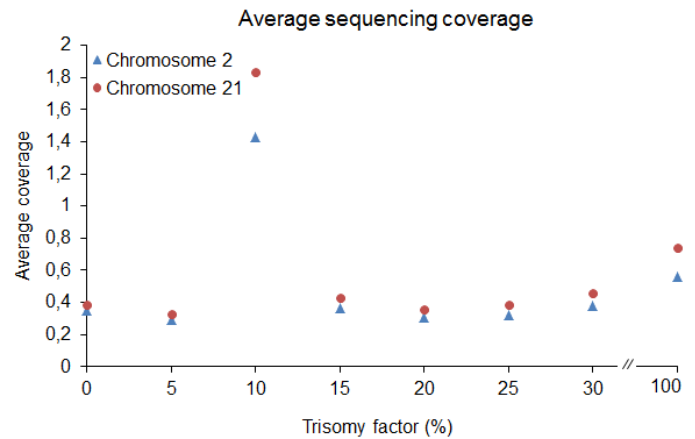

**Supplementary Fig. 9.** Low coverage genome re-sequencing to detect chromosome 21 trisomy. The table (a) concludes sequencing and data analysis outcomes over eight different chromosome 21 proportions. The same acoustically sheared cell line genomic DNAs were used as in TAC-seq experiment. Factor 0% corresponds to euploid chromosome 21 and 100% to full trisomy 21, respectively. Z-score based trisomy detection indicates aneuploidy already at 5% level (Z-score 4.8) and has an increasing trend to 100%. The 10% sample is interpreted as an outlier due to (b) abnormal Z-score value and (c) significantly higher sequencing coverage compared to the rest of the parallel studied samples.

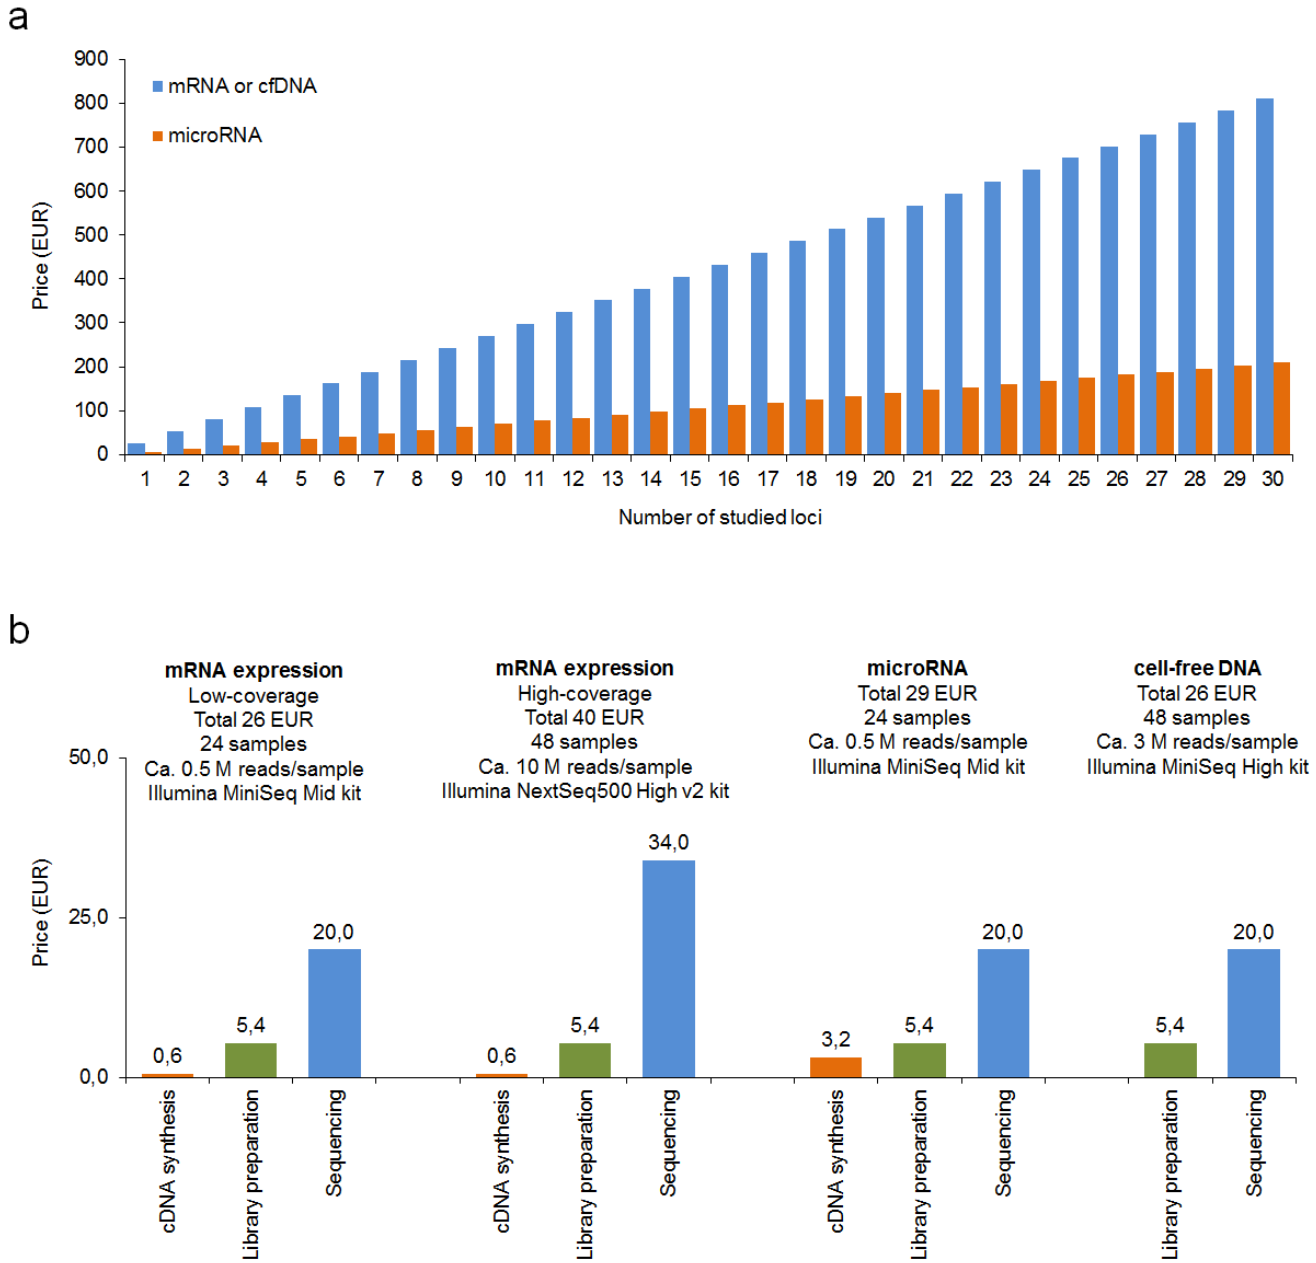

**Supplementary Fig. 10.** Estimated setup and running cost of different TAC-seq applications. Setup cost of TAC-seq depends on number of studied loci due to the need of specific detector oligonucleotides. (a) mRNA and cell-free DNA loci need two specific detector oligonucleotides where right hand is 5' phosphorylated. As miRNA assay uses only one specific unmodified detector oligonucleotide and an universal phosphorylated detector oligonucleotide for all loci, the setup cost is significantly lower compared to mRNA and cell-free DNA. (b) Reagent costs are provided per each application highlighting the rough estimation of cDNA synthesis, library preparation and estimated sequencing costs based on required consumables and sequencing depth (see in Supplementary Table 2).

## Supplementary Table 1.

ERCC spike-in molecule calculation and sequencing outcome at different UMI thresholds

| Assay ID | ERCC ID    | ERCC group | mRNA length (bp) | Concentration in Mix 1 (attomoles/ $\mu$ l). Based on ERCC manual | Molecules in Mix 1 (molecules/ $\mu$ l) | 100x dilution (molecules/ $\mu$ l). Standard storage aliquot. Diluted with water | Molecules in 1.3 $\mu$ l storage aliquot | Dilution prior reverse transcriptase. Add 199 $\mu$ l water (extra 153x dilution). 15300x | Molecules added to RT master mix | Assayd molecules | Average raw reads per replicate* (UMI = 0) |
|----------|------------|------------|------------------|-------------------------------------------------------------------|-----------------------------------------|----------------------------------------------------------------------------------|------------------------------------------|-------------------------------------------------------------------------------------------|----------------------------------|------------------|--------------------------------------------|
| 1        | ERCC-00130 | A          | 1037             | 30000,00                                                          | 18066424500,00                          | 180664245,00                                                                     | 234863518,50                             | 1180218,69                                                                                | 1180218,69                       | Not designed     | NA                                         |
| 2        | ERCC-00004 | A          | 499              | 7500,00                                                           | 4516606125,00                           | 45166061,25                                                                      | 58715879,63                              | 295054,67                                                                                 | 295054,67                        | +                | 21361456                                   |
| 3        | ERCC-00136 | A          | 1011             | 1875,00                                                           | 1129151531,25                           | 11291515,31                                                                      | 14678969,91                              | 73763,67                                                                                  | 73763,67                         | +                | 7879306                                    |
| 4        | ERCC-00108 | A          | 997              | 937,50                                                            | 564575765,63                            | 5645757,66                                                                       | 7339484,95                               | 36881,83                                                                                  | 36881,83                         | +                | 2406283                                    |
| 5        | ERCC-00116 | A          | 1969             | 468,75                                                            | 282287882,81                            | 2822878,83                                                                       | 3669742,48                               | 18440,92                                                                                  | 18440,92                         | +                | 485700                                     |
| 6        | ERCC-00092 | A          | 1100             | 234,38                                                            | 141143941,41                            | 1411439,41                                                                       | 1834871,24                               | 9220,46                                                                                   | 9220,46                          | +                | 436326                                     |
| 7        | ERCC-00095 | A          | 499              | 117,19                                                            | 70571970,70                             | 705719,71                                                                        | 917435,62                                | 4610,23                                                                                   | 4610,23                          | +                | 606145                                     |
| 8        | ERCC-00131 | A          | 747              | 117,19                                                            | 70571970,70                             | 705719,71                                                                        | 917435,62                                | 4610,23                                                                                   | 4610,23                          | +                | 10915                                      |
| 9        | ERCC-00062 | A          | 999              | 58,59                                                             | 35285985,35                             | 352859,85                                                                        | 458717,81                                | 2305,11                                                                                   | 2305,11                          | +                | 122368                                     |
| 10       | ERCC-00019 | A          | 619              | 29,30                                                             | 17642992,68                             | 176429,93                                                                        | 229358,90                                | 1152,56                                                                                   | 1152,56                          | +                | 14704                                      |
| 11       | ERCC-00144 | A          | 513              | 29,30                                                             | 17642992,68                             | 176429,93                                                                        | 229358,90                                | 1152,56                                                                                   | 1152,56                          | +                | 6082                                       |
| 12       | ERCC-00170 | A          | 999              | 14,65                                                             | 8821496,34                              | 88214,96                                                                         | 114679,45                                | 576,28                                                                                    | 576,28                           | +                | 45843                                      |
| 13       | ERCC-00154 | A          | 513              | 7,32                                                              | 4410748,17                              | 44107,48                                                                         | 57339,73                                 | 288,14                                                                                    | 288,14                           | +                | 8327                                       |
| 14       | ERCC-00085 | A          | 820              | 7,32                                                              | 4410748,17                              | 44107,48                                                                         | 57339,73                                 | 288,14                                                                                    | 288,14                           | +                | 7622                                       |
| 15       | ERCC-00028 | A          | 1106             | 3,66                                                              | 2205374,09                              | 22053,74                                                                         | 28669,86                                 | 144,07                                                                                    | 144,07                           | +                | 4514                                       |
| 16       | ERCC-00033 | A          | 2000             | 1,83                                                              | 1102687,04                              | 11026,87                                                                         | 14334,93                                 | 72,03                                                                                     | 72,03                            | +                | 1704                                       |
| 17       | ERCC-00134 | A          | 249              | 1,83                                                              | 1102687,04                              | 11026,87                                                                         | 14334,93                                 | 72,03                                                                                     | 72,03                            | +                | 1380                                       |
| 18       | ERCC-00147 | A          | 999              | 0,92                                                              | 551343,52                               | 5513,44                                                                          | 7167,47                                  | 36,02                                                                                     | 36,02                            | +                | 1640                                       |
| 19       | ERCC-00097 | A          | 498              | 0,46                                                              | 275671,76                               | 2756,72                                                                          | 3583,73                                  | 18,01                                                                                     | 18,01                            | +                | 211                                        |
| 20       | ERCC-00156 | A          | 470              | 0,46                                                              | 275671,76                               | 2756,72                                                                          | 3583,73                                  | 18,01                                                                                     | 18,01                            | +                | 474                                        |
| 21       | ERCC-00123 | A          | 998              | 0,23                                                              | 137835,88                               | 1378,36                                                                          | 1791,87                                  | 9,00                                                                                      | 9,00                             | +                | 181                                        |
| 22       | ERCC-00017 | A          | 1113             | 0,11                                                              | 68917,94                                | 689,18                                                                           | 895,93                                   | 4,50                                                                                      | 4,50                             | +                | 268                                        |
| 23       | ERCC-00083 | A          | 999              | 0,03                                                              | 17229,49                                | 172,29                                                                           | 223,98                                   | 1,13                                                                                      | 1,13                             | +                | 500                                        |

\* Average calculation over seven replicates





## Supplementary Table 2

Reagent cost for experiments used in this study (cDNA synthesis + ligation + PCR + purification and QC)

| Reagents                                      | Supplier             | Cat #       | No. rxn | Price per kit (EUR) | Unitary cost (EUR) |
|-----------------------------------------------|----------------------|-------------|---------|---------------------|--------------------|
| Maxima H Minus Reverse Transcriptase          | ThermoFisher         | EP0753      | 2000    | 522                 | 0,261              |
| dNTP mix                                      | ThermoFisher         | R0181       | 50000   | 105                 | 0,002              |
| Oligo-T30                                     | SigmaAldrich         |             | 10000   | 10                  | 0,001              |
| RNase inhibitor                               | ThermoFisher         | EO0384      | 15000   | 840                 | 0,056              |
| Betaine (5 M solution)                        | SigmaAldrich         | B0300-5VL   | 5000    | 115                 | 0,023              |
| Dynabeads MyOne Carboxylic Acid beads         | ThermoFisher         | 65012       | 2500    | 512                 | 0,205              |
| T4 RNA Ligase 2, truncated                    | NewEngland Biolabs   | M0242L      | 250     | 268                 | 1,072              |
| 5'-Deadenylase                                | NewEngland Biolabs   | M0331S      | 200     | 68                  | 0,34               |
| Lambda exonuclease                            | NewEngland Biolabs   | M0262L      | 2000    | 268                 | 0,134              |
| Exonuclease I                                 | ThermoFisher         | EN0582      | 1000    | 305                 | 0,305              |
| Micro RT biotin primer                        | SigmaAldrich         |             | 1000    | 10                  | 0,01               |
| RNase inhibitor                               | ThermoFisher         | EO0384      | 7500    | 840                 | 0,112              |
| dNTP mix                                      | ThermoFisher         | R0181       | 50000   | 105                 | 0,002              |
| Maxima H Minus Reverse Transcriptase          | ThermoFisher         | EP0753      | 1000    | 522                 | 0,522              |
| Dynabeads MyOne Streptavidin C1 beads         | ThermoFisher         | 65001       | 660     | 463                 | 0,702              |
| Taq DNA ligase                                | NewEngland Biolabs   | M0208L      | 10000   | 322                 | 0,032              |
| TAC-seq Left primer                           | SigmaAldrich         |             | 2000    | 10                  | 0,005              |
| HOT FIREPol Blend Master Mix                  | SolisBiodyne         | 04-27-00125 | 5000    | 460                 | 0,092              |
| NucleoSpin Gel and PCR Clean-up               | Macherey-Nagel       | 740609.250  | 250     | 300                 | 1,200              |
| AMPure XP beads                               | Beckman Coulter      | A63881      | 1200    | 1071                | 0,893              |
| TapeStation High Sensitivity D1000 ScreenTape | Agilent Technologies | 5067-5584   | 120     | 380                 | 3,167              |
| <b>mRNA cDNA synthesis</b>                    |                      |             |         |                     | <b>0,55</b>        |
| <b>microRNA cDNA synthesis</b>                |                      |             |         |                     | <b>3,20</b>        |
| <b>ligation/PCR/purification</b>              |                      |             |         |                     | <b>5,39</b>        |
| <b>mRNA sample/library total</b>              |                      |             |         |                     | <b>5,94</b>        |
| <b>microRNA sample/library total</b>          |                      |             |         |                     | <b>8,59</b>        |
| <b>cell-free DNA sample/library total</b>     |                      |             |         |                     | <b>5,39</b>        |

### Supplementary Table 3

Used oligonucleotides

| Name of oligonucleotide     | Modification |       | Sequence (5'-3')                                                            | Producer | Purification |
|-----------------------------|--------------|-------|-----------------------------------------------------------------------------|----------|--------------|
|                             | 5'           | 3'    |                                                                             |          |              |
| Oligo-T30                   |              |       | TTTTTTTTTTTTTTTTTTTTTTTTTTTTTTTTTTTT                                        | Sigma    | HPLC         |
| Micro RT biotin             | Biotin       |       | GCTCCAGAGACGTGTGCTCTTCCGATCT                                                | Metabion | Desalted     |
| Adenylated 3' linker        | Adenylate    | Amine | AGATCGGAAGAGCACACGTCT                                                       | NEB      | HPLC         |
| TAC-seq left                |              |       | AATGATACGGCGACCACCGAGATCTACACTAACAACACTCTTTCCCTACAC-GACGCTCTTCCGATCT        | Sigma    | HPLC         |
| miRNA spike-in              |              |       | ACGACGCTCTCCGATCTNNNNNNNNRKCYNKMNARNNNNCNANNHA-NNNNNATCTCGTATGCCGCTTCTGCTTG | Metabion | Desalted     |
| miRNA spike-in right primer |              |       | TAGAGCATACGGCAGAAGACGAAC                                                    | Metabion | Desalted     |
| Barcode-seq primer LNA      |              |       | CT+GGAGCT+GTCTGC+GACTTT                                                     | Exiqon   | HPLC         |
| TAC-seq barcode 1           |              |       | CAAGCAGAAGACGGCATAACGAGATGATCTGAAAGTCGCAGACAGCTCCAG                         | Sigma    | HPLC         |
| TAC-seq barcode 2           |              |       | CAAGCAGAAGACGGCATAACGAGATGCCATAAAAGTCGCAGACAGCTCCAG                         | Sigma    | HPLC         |
| TAC-seq barcode 3           |              |       | CAAGCAGAAGACGGCATAACGAGATCGTGATAAAGTCGCAGACAGCTCCAG                         | Sigma    | HPLC         |
| TAC-seq barcode 4           |              |       | CAAGCAGAAGACGGCATAACGAGATTGGTCAAAGTCGCAGACAGCTCCAG                          | Sigma    | HPLC         |
| TAC-seq barcode 5           |              |       | CAAGCAGAAGACGGCATAACGAGATTGGCAAAGTCGCAGACAGCTCCAG                           | Sigma    | HPLC         |
| TAC-seq barcode 6           |              |       | CAAGCAGAAGACGGCATAACGAGATCTGATCAAAGTCGCAGACAGCTCCAG                         | Sigma    | HPLC         |
| TAC-seq barcode 7           |              |       | CAAGCAGAAGACGGCATAACGAGATGTAGCCAAAGTCGCAGACAGCTCCAG                         | Sigma    | HPLC         |
| TAC-seq barcode 8           |              |       | CAAGCAGAAGACGGCATAACGAGATTACAAGAAAGTCGCAGACAGCTCCAG                         | Sigma    | HPLC         |
| TAC-seq barcode 9           |              |       | CAAGCAGAAGACGGCATAACGAGATACAGTAAAGTCGCAGACAGCTCCAG                          | Sigma    | HPLC         |
| TAC-seq barcode 10          |              |       | CAAGCAGAAGACGGCATAACGAGATAGGAATAAAGTCGCAGACAGCTCCAG                         | Sigma    | HPLC         |
| TAC-seq barcode 11          |              |       | CAAGCAGAAGACGGCATAACGAGATTAGTTGAAAGTCGCAGACAGCTCCAG                         | Sigma    | HPLC         |
| TAC-seq barcode 12          |              |       | CAAGCAGAAGACGGCATAACGAGATATCGTGAAAGTCGCAGACAGCTCCAG                         | Sigma    | HPLC         |
| TAC-seq barcode 13          |              |       | CAAGCAGAAGACGGCATAACGAGATTGAGTGAAAGTCGCAGACAGCTCCAG                         | Sigma    | HPLC         |
| TAC-seq barcode 14          |              |       | CAAGCAGAAGACGGCATAACGAGATGCCATAAAGTCGCAGACAGCTCCAG                          | Sigma    | HPLC         |
| TAC-seq barcode 15          |              |       | CAAGCAGAAGACGGCATAACGAGATTGTTGGAAAGTCGCAGACAGCTCCAG                         | Sigma    | HPLC         |
| TAC-seq barcode 16          |              |       | CAAGCAGAAGACGGCATAACGAGATAGCATCAAAGTCGCAGACAGCTCCAG                         | Sigma    | HPLC         |
| ERCC-00004_L                |              |       | ACACGACGCTCTTCCGATCTNNNNCCCAATATCAGACATTCTGTAGATAA                          | Metabion | Desalted     |
| ERCC-00017_L                |              |       | ACACGACGCTCTTCCGATCTNNNNCTAGGCGGTTGCGCAAGTAACTTCATC                         | Metabion | Desalted     |
| ERCC-00019_L                |              |       | ACACGACGCTCTTCCGATCTNNNNAGGGAGTACGAGCAGTGCACCGTTGAA                         | Metabion | Desalted     |
| ERCC-00028_L                |              |       | ACACGACGCTCTTCCGATCTNNNNGGTAAACAACGGGAATATAATTCACT                          | Metabion | Desalted     |
| ERCC-00033_L                |              |       | ACACGACGCTCTTCCGATCTNNNNAGGTTCCATCACCAACTCTGTTTATA                          | Metabion | Desalted     |
| ERCC-00062_L                |              |       | ACACGACGCTCTTCCGATCTNNNNNTCTATGTCTTGCAAAAACGGCTATTGA                        | Metabion | Desalted     |
| ERCC-00083_L                |              |       | ACACGACGCTCTTCCGATCTNNNNCACAGTGTCTTTTTTCTTCGTCTAATG                         | Metabion | Desalted     |
| ERCC-00085_L                |              |       | ACACGACGCTCTTCCGATCTNNNNNTCAACAAGGGTAATCCCCTCCGACAACC                       | Metabion | Desalted     |
| ERCC-00092_L                |              |       | ACACGACGCTCTTCCGATCTNNNNNGCGTTTTTTTGTCTGTGTGCGAGAACG                        | Metabion | Desalted     |
| ERCC-00095_L                |              |       | ACACGACGCTCTTCCGATCTNNNNNTGGGCCAAATGCAACATTATCATAGA                         | Metabion | Desalted     |
| ERCC-00097_L                |              |       | ACACGACGCTCTTCCGATCTNNNNCTAATTCACAAGTTCAGCCAACAAA                           | Metabion | Desalted     |

|              |     |  |                                                      |          |          |
|--------------|-----|--|------------------------------------------------------|----------|----------|
| ERCC-00108_L |     |  | ACACGACGCTCTCCGATCTNNNNNGACTGTGCGCTCATAGCCGACACTGTG  | Metabion | Desalted |
| ERCC-00116_L |     |  | ACACGACGCTCTCCGATCTNNNNCTGAGACACTGATCGAGCATTAAAGACT  | Metabion | Desalted |
| ERCC-00123_L |     |  | ACACGACGCTCTCCGATCTNNNNCCAGTACCTCTTTCCAGATGCTATC     | Metabion | Desalted |
| ERCC-00130_L |     |  | ACACGACGCTCTCCGATCTNNNNNTAAAGAAGCGATTACGCGCTATTTGCG  | Metabion | Desalted |
| ERCC-00131_L |     |  | ACACGACGCTCTCCGATCTNNNNCTAGTATTGGCTCCTGTCCACATGGTC   | Metabion | Desalted |
| ERCC-00134_L |     |  | ACACGACGCTCTCCGATCTNNNNCGCTCGTTCAATAGATTTAGTAACTAC   | Metabion | Desalted |
| ERCC-00136_L |     |  | ACACGACGCTCTCCGATCTNNNNACTTCGCAAAGACGATTGACTAGTTTC   | Metabion | Desalted |
| ERCC-00144_L |     |  | ACACGACGCTCTCCGATCTNNNNGGCACATAATCAAGTCTACATCAATCA   | Metabion | Desalted |
| ERCC-00147_L |     |  | ACACGACGCTCTCCGATCTNNNNGAAGCTCCAGGTATTCCACCAGCTAAG   | Metabion | Desalted |
| ERCC-00154_L |     |  | ACACGACGCTCTCCGATCTNNNNAGTCCACGAGTTACAGCCAGCGGGTTT   | Metabion | Desalted |
| ERCC-00156_L |     |  | ACACGACGCTCTCCGATCTNNNNNGACTAGTCGAATCTTAGGGTTGTATGC  | Metabion | Desalted |
| ERCC-00170_L |     |  | ACACGACGCTCTCCGATCTNNNNCTGTGTTCCAGCTACAAACTTAGAAAC   | Metabion | Desalted |
| ERCC-00004_R | Pho |  | AATCACCGCTTGCCTGTTTTGCCACNNNNCTGGAGCTGTCTGCGACTTT    | Metabion | Desalted |
| ERCC-00017_R | Pho |  | ATGTATCGCTGGGAATAATGTTCTGNNNNCTGGAGCTGTCTGCGACTTT    | Metabion | Desalted |
| ERCC-00019_R | Pho |  | ACAAGCACAGGAGGTATGAAGCATCAGNNNNCTGGAGCTGTCTGCGACTTT  | Metabion | Desalted |
| ERCC-00028_R | Pho |  | TGAACCGGTGTGGAGCCTGCACTTGGANNNNCTGGAGCTGTCTGCGACTTT  | Metabion | Desalted |
| ERCC-00033_R | Pho |  | CAATGGCTACATTGGCAAATGCATTAANNNNCTGGAGCTGTCTGCGACTTT  | Metabion | Desalted |
| ERCC-00062_R | Pho |  | AGCAATCCTCTCCCCAATACTTAAAAANNNNCTGGAGCTGTCTGCGACTTT  | Metabion | Desalted |
| ERCC-00083_R | Pho |  | TTTCATAGCCTTCTGGAATTTCTTCTNNNNCTGGAGCTGTCTGCGACTTT   | Metabion | Desalted |
| ERCC-00085_R | Pho |  | CTCAGTGTATCATCCGCGTCAAGGGGNNNNCTGGAGCTGTCTGCGACTTT   | Metabion | Desalted |
| ERCC-00092_R | Pho |  | CGATTTGCTCCGAAAGCTTTAAGCCGTNNNNCTGGAGCTGTCTGCGACTTT  | Metabion | Desalted |
| ERCC-00095_R | Pho |  | TGCTCATAGCAAAGGATTTGGTTTTGNNNNCTGGAGCTGTCTGCGACTTT   | Metabion | Desalted |
| ERCC-00097_R | Pho |  | CCAATAGCATCAAACCATGTCATGNNNNCTGGAGCTGTCTGCGACTTT     | Metabion | Desalted |
| ERCC-00108_R | Pho |  | CTCGATAAGACCACGCTGTGCGGATATNNNNCTGGAGCTGTCTGCGACTTT  | Metabion | Desalted |
| ERCC-00116_R | Pho |  | CTAGAGCGGCCGCCGACTAGTGAGCTCNNNNCTGGAGCTGTCTGCGACTTT  | Metabion | Desalted |
| ERCC-00123_R | Pho |  | GCGATAGCTATTCCATTAATGTCACCANNNNCTGGAGCTGTCTGCGACTTT  | Metabion | Desalted |
| ERCC-00130_R | Pho |  | CCAAGAAGCTTTAACGCTTGAATTTNNNNCTGGAGCTGTCTGCGACTTT    | Metabion | Desalted |
| ERCC-00131_R | Pho |  | GGGTTTTCCGCCCCAAACATGCAAACNNNNCTGGAGCTGTCTGCGACTTT   | Metabion | Desalted |
| ERCC-00134_R | Pho |  | TGCCTTACAAATAGCTACTGAGATGCTNNNNCTGGAGCTGTCTGCGACTTT  | Metabion | Desalted |
| ERCC-00136_R | Pho |  | CCTTGTGAACTAGGATTTCCCGGTANNNNCTGGAGCTGTCTGCGACTTT    | Metabion | Desalted |
| ERCC-00144_R | Pho |  | TGAATGGTTTCTGATTTGCTACCATCANNNNCTGGAGCTGTCTGCGACTTT  | Metabion | Desalted |
| ERCC-00147_R | Pho |  | CACAGAAGTGGAAGACATTA AAAACCTNNNNCTGGAGCTGTCTGCGACTTT | Metabion | Desalted |
| ERCC-00154_R | Pho |  | TAAGGGGGTATTAGCATCTCGAGTGAGNNNNCTGGAGCTGTCTGCGACTTT  | Metabion | Desalted |
| ERCC-00156_R | Pho |  | TAGAACGGCATGGTATAAGCCGTGCTCNNNNCTGGAGCTGTCTGCGACTTT  | Metabion | Desalted |
| ERCC-00170_R | Pho |  | AAGTGGAGCTGAGATTACAGCAGAGAANNNNCTGGAGCTGTCTGCGACTTT  | Metabion | Desalted |
| PPIA-1638_L  |     |  | ACACGACGCTCTCCGATCTNNNNNGACTTGTGTTTTATCTTACCACCAGA   | Metabion | Desalted |
| CYC1-83_L    |     |  | ACACGACGCTCTCCGATCTNNNNGCCATCCCAGGCCTGTTACAGGCCTCAG  | Metabion | Desalted |
| YWHAZ-4145_L |     |  | ACACGACGCTCTCCGATCTNNNNCTGAAGCAGGAGAAGGAGGGGAAAAT    | Metabion | Desalted |
| GAPDH-58_L   |     |  | ACACGACGCTCTCCGATCTNNNNACACTGAATCTCCCCTCCTCACAGTTG   | Metabion | Desalted |
| HMBS-36_L    |     |  | ACACGACGCTCTCCGATCTNNNNAGTATGTGGGGCTTCATCTTTTAGA     | Metabion | Desalted |
| TBP-343_L    |     |  | ACACGACGCTCTCCGATCTNNNNCTGTGAGTTGCTCATACCGTGCTGCTA   | Metabion | Desalted |
| ACTB-5_L     |     |  | ACACGACGCTCTCCGATCTNNNNCAGGGCTTACCTGTACACTGACTTGAG   | Metabion | Desalted |
| SDHA-333_L   |     |  | ACACGACGCTCTCCGATCTNNNNNGACGTTGGCACTGGGAAGGTCCTCT    | Metabion | Desalted |



|                |  |                                                      |          |          |
|----------------|--|------------------------------------------------------|----------|----------|
| CFD-416_L      |  | ACACGACGCTCTCCGATCTNNNNNGCGGCAACCGCAAGAAGCCCGGGATCT  | Metabion | Desalted |
| MT1H-87_L      |  | ACACGACGCTCTCCGATCTNNNNNTGTGCGGACAGCCCTGCTGTGATGATGA | Metabion | Desalted |
| GADD45A-518_L  |  | ACACGACGCTCTCCGATCTNNNNNACGGTGATGGCATCTGAATGAAAATAA  | Metabion | Desalted |
| MT1G-88_L      |  | ACACGACGCTCTCCGATCTNNNNNACAGCCCTGCTCCCAAGTACAAATAGA  | Metabion | Desalted |
| IL15-984_L     |  | ACACGACGCTCTCCGATCTNNNNNGTTTTTCTGTCAAGAAGATGATCAGAC  | Metabion | Desalted |
| OLFM1-2052_L   |  | ACACGACGCTCTCCGATCTNNNNGTACGTGGAGAAGATGGAGAACCAAAT   | Metabion | Desalted |
| CEBPD-64_L     |  | ACACGACGCTCTCCGATCTNNNNNGACTTTTCAGACAAAACCCTTTGTATTG | Metabion | Desalted |
| EDN3-1589_L    |  | ACACGACGCTCTCCGATCTNNNNNAGCAAGCAGGCTTTAGACCTCCACCAT  | Metabion | Desalted |
| G0S2-76_L      |  | ACACGACGCTCTCCGATCTNNNNNGTGTGAATTATCTAAATGCGTCTACCA  | Metabion | Desalted |
| GNLY-146_L     |  | ACACGACGCTCTCCGATCTNNNNCGCTTCCCTCGATCCAGAATCCACTCTC  | Metabion | Desalted |
| DEFB1-107_L    |  | ACACGACGCTCTCCGATCTNNNNNTTACCAAAATTCAGGCACCTGTTAC    | Metabion | Desalted |
| PAEP-247_L     |  | ACACGACGCTCTCCGATCTNNNNNATGACGTGGTCATCTGTGTGCGCCATCC | Metabion | Desalted |
| IGFBP1-70_L    |  | ACACGACGCTCTCCGATCTNNNNNTTACATAATCAAAGCTACCTGTGGTGA  | Metabion | Desalted |
| DYNLT3-360_L   |  | ACACGACGCTCTCCGATCTNNNNNAGAGAGCGGAACCATAACTCATTGAAT  | Metabion | Desalted |
| CRABP2-160_L   |  | ACACGACGCTCTCCGATCTNNNNNAAGAGCCAGATCACCCATTCCGGGTT   | Metabion | Desalted |
| NDRG1-1530_L   |  | ACACGACGCTCTCCGATCTNNNNNAAGAGTGAGCTCTGGTGGAGACAAATG  | Metabion | Desalted |
| ID4-39_L       |  | ACACGACGCTCTCCGATCTNNNNNCACTATAGCTATGTTACGCTAAGCTAC  | Metabion | Desalted |
| MMP7-44_L      |  | ACACGACGCTCTCCGATCTNNNNNGTGTACTGTGTCTTATTTCATCTATAC  | Metabion | Desalted |
| ANXA4-1586_L   |  | ACACGACGCTCTCCGATCTNNNNNACATCTGGAGACTACAGGAAAGTACTG  | Metabion | Desalted |
| TSPAN8-99_L    |  | ACACGACGCTCTCCGATCTNNNNNAGCTGTCTTTTTAAAATGTCTCGGCTA  | Metabion | Desalted |
| EDNRB-2862_L   |  | ACACGACGCTCTCCGATCTNNNNNTCCTGCATTAACCCAATTGCTCTGTAT  | Metabion | Desalted |
| NNMT-833_L     |  | ACACGACGCTCTCCGATCTNNNNCAAAAGTTATTCTCCACCATGGCCAAC   | Metabion | Desalted |
| CLDN4-221_L    |  | ACACGACGCTCTCCGATCTNNNNTTGCCAGCTCTGTGGCCCTCAGGACTC   | Metabion | Desalted |
| EFNA1-62_L     |  | ACACGACGCTCTCCGATCTNNNNNGCCACGTGTATAGTATCTGTATATAA   | Metabion | Desalted |
| COMP-138_L     |  | ACACGACGCTCTCCGATCTNNNNNTGACACCATCCCAGAGGACTATGAGAC  | Metabion | Desalted |
| CD55-1548_L    |  | ACACGACGCTCTCCGATCTNNNNNGAAACAACCCCAAATAAAGGAAGTGGA  | Metabion | Desalted |
| DKK1-175_L     |  | ACACGACGCTCTCCGATCTNNNNNTTGTGTGTGTGTACGTATGTGTGTGTT  | Metabion | Desalted |
| SPP1-313_L     |  | ACACGACGCTCTCCGATCTNNNNNTGGCTTCATGAAACTCCCTGTAAACT   | Metabion | Desalted |
| AQP3-170_L     |  | ACACGACGCTCTCCGATCTNNNNNTAATGCAGGCATGAAGGGTGGAGTGAA  | Metabion | Desalted |
| S100P-29_L     |  | ACACGACGCTCTCCGATCTNNNNCTTCCAAAAGTGTGTTGGCAATTA      | Metabion | Desalted |
| APOD-94_L      |  | ACACGACGCTCTCCGATCTNNNNNTCCCTACCCCCCCCCATAAAGACAA    | Metabion | Desalted |
| ACADSB-4320_L  |  | ACACGACGCTCTCCGATCTNNNNCTGTTAACTTAGGCACAGGAGATCCA    | Metabion | Desalted |
| C10orf10-368_L |  | ACACGACGCTCTCCGATCTNNNNNAGCAAGAAGGTGAGGCATCAGGGAACG  | Metabion | Desalted |
| ABCC3-4217_L   |  | ACACGACGCTCTCCGATCTNNNNCGCTTTCATGGTCTTGCTGATTCCACT   | Metabion | Desalted |
| TCN1-40_L      |  | ACACGACGCTCTCCGATCTNNNNNTATCCCAGTACGAGCAGGAGAGTTAAT  | Metabion | Desalted |
| IDO1-153_L     |  | ACACGACGCTCTCCGATCTNNNNCTGTATGCATTCCGTGCTATTACCCATT  | Metabion | Desalted |
| GPX3-34_L      |  | ACACGACGCTCTCCGATCTNNNNNTTCCGAGGACGTGCCCTCACCCCTCAC  | Metabion | Desalted |
| BCL6-1192_L    |  | ACACGACGCTCTCCGATCTNNNNNAGGAGAGAAACCTTACCATTGTGAGA   | Metabion | Desalted |
| ANXA2-239_L    |  | ACACGACGCTCTCCGATCTNNNNNAAGGAGTTGGAAGTGAAGTCTATGATG  | Metabion | Desalted |
| SFRP4-23_L     |  | ACACGACGCTCTCCGATCTNNNNCAACAAACTGTTGTGCTATTGGATACT   | Metabion | Desalted |
| SERPING1-81_L  |  | ACACGACGCTCTCCGATCTNNNNNGGGTCTGGGCAAGGGACCTGCTTCTAT  | Metabion | Desalted |
| ARG2-34_L      |  | ACACGACGCTCTCCGATCTNNNNNAGCTGTCACTTAGGGATAACACTGTCT  | Metabion | Desalted |
| C1R-156_L      |  | ACACGACGCTCTCCGATCTNNNNNAAGACCGTGTGTGAAATTCCTTTCT    | Metabion | Desalted |

|               |     |  |                                                      |          |          |
|---------------|-----|--|------------------------------------------------------|----------|----------|
| C4BPA-161_L   |     |  | ACACGACGCTCTCCGATCTNNNNCCTCTTGCAATTCAATACAGATCAGTT   | Metabion | Desalted |
| GBP2-987_L    |     |  | ACACGACGCTCTCCGATCTNNNNCCTCTCCCAAGAAACAACATGAATGA    | Metabion | Desalted |
| LAMB3-174_L   |     |  | ACACGACGCTCTCCGATCTNNNNGCCAATGGGACAGTTACACTTGACAGA   | Metabion | Desalted |
| ARID5B-3946_L |     |  | ACACGACGCTCTCCGATCTNNNNCATTACCCCTTAGCTGTATAAATCC     | Metabion | Desalted |
| DPP4-427_L    |     |  | ACACGACGCTCTCCGATCTNNNNCTCAGGAAATCAAATATGCAAAGCACT   | Metabion | Desalted |
| SLC1A1-123_L  |     |  | ACACGACGCTCTCCGATCTNNNNGTCTACCCCTTACTAGGTTGCCCCAA    | Metabion | Desalted |
| HABP2-18_L    |     |  | ACACGACGCTCTCCGATCTNNNNNTGTTTGAGCTGCGTTTCACACTTCTT   | Metabion | Desalted |
| MAOA-59_L     |     |  | ACACGACGCTCTCCGATCTNNNNGTGCTACACGTTGGAGTATACCTATGT   | Metabion | Desalted |
| PRUNE2-190_L  |     |  | ACACGACGCTCTCCGATCTNNNNCGTCTTATCACAATGCCTCAGTAGTTT   | Metabion | Desalted |
| DDX52-5_L     |     |  | ACACGACGCTCTCCGATCTNNNNCGGAGACTATCAAAGGGCCCTTCAGGA   | Metabion | Desalted |
| CP-45_L       |     |  | ACACGACGCTCTCCGATCTNNNNCCTTAAAGTGTCTTGGGATGAAAATG    | Metabion | Desalted |
| MAP3K5-749_L  |     |  | ACACGACGCTCTCCGATCTNNNNACGTGATGACTTAAATGCTTGAGACT    | Metabion | Desalted |
| ENPEP-314_L   |     |  | ACACGACGCTCTCCGATCTNNNNNTGGAATAGAACTTAGCCAGCACAGAGT  | Metabion | Desalted |
| AOX1-528_L    |     |  | ACACGACGCTCTCCGATCTNNNNGGTGATATCCGTCACTACTGTCTCT     | Metabion | Desalted |
| CFD-416_R     | Pho |  | ACACCCGCGTGGCGAGCTATGCGGCCCTNNNNCTGGAGCTGTCTGCGACTTT | Metabion | Desalted |
| MT1H-87_R     | Pho |  | AAACAGAATGACACGTAATAATCCAGGANNNNCTGGAGCTGTCTGCGACTTT | Metabion | Desalted |
| GADD45A-518_R | Pho |  | CTGAACCAAATTGCACTGAAGTTTTGNNNNCTGGAGCTGTCTGCGACTTT   | Metabion | Desalted |
| MT1G-88_R     | Pho |  | GTGACCCGTAATAATCCAGGATTTTTGNNNNCTGGAGCTGTCTGCGACTTT  | Metabion | Desalted |
| IL15-984_R    | Pho |  | CTTGGATCAGATGAACCTTAGAAATGNNNNCTGGAGCTGTCTGCGACTTT   | Metabion | Desalted |
| OLFM1-2052_R  | Pho |  | GAAAGGACTGGAGTCCAAGTTCAAACANNNNCTGGAGCTGTCTGCGACTTT  | Metabion | Desalted |
| CEBPD-64_R    | Pho |  | TAGATAAGAGGAAAAGACTGAGCATGCNNNNCTGGAGCTGTCTGCGACTTT  | Metabion | Desalted |
| EDN3-1589_R   | Pho |  | CCAAAGCTCATGCCCGCAGTGGACTCANNNNCTGGAGCTGTCTGCGACTTT  | Metabion | Desalted |
| GOS2-76_R     | Pho |  | TTTTGCACTAGGGAAGGATAAATGNNNNCTGGAGCTGTCTGCGACTTT     | Metabion | Desalted |
| GNLY-146_R    | Pho |  | CAGTCTCCCTCCCTGACTCCCTCTGCNNNNCTGGAGCTGTCTGCGACTTT   | Metabion | Desalted |
| DEFB1-107_R   | Pho |  | AGAGGGAAGGCCAAGTGCTGCAAGTGANNNNCTGGAGCTGTCTGCGACTTT  | Metabion | Desalted |
| PAEP-247_R    | Pho |  | CCTTCCTGCTGCACACCTGCACCACGGNNNNCTGGAGCTGTCTGCGACTTT  | Metabion | Desalted |
| IGFBP1-70_R   | Pho |  | TGTTGCCACCTGTTAAATGTACTGNNNNCTGGAGCTGTCTGCGACTTT     | Metabion | Desalted |
| DYNLT3-360_R  | Pho |  | TTTGGAGAGGAATAAGCTTAGCGTTAANNNNCTGGAGCTGTCTGCGACTTT  | Metabion | Desalted |
| CRABP2-160_R  | Pho |  | CACTCCCCGCTCCCAAGTCAGCAGTNNNNCTGGAGCTGTCTGCGACTTT    | Metabion | Desalted |
| NDRG1-1530_R  | Pho |  | AGGTCTATTACGTGGTGCCCTCTCCANNNNCTGGAGCTGTCTGCGACTTT   | Metabion | Desalted |
| ID4-39_R      | Pho |  | TGTCCAATCTCTTGTGATGTGTAACCTNNNNCTGGAGCTGTCTGCGACTTT  | Metabion | Desalted |
| MMP7-44_R     | Pho |  | TTGCAGTGGGTAGATGTCAATAAATGNNNNCTGGAGCTGTCTGCGACTTT   | Metabion | Desalted |
| ANXA4-1586_R  | Pho |  | CTTGTCTCTGTGGAGGAGATGATTAANNNNCTGGAGCTGTCTGCGACTTT   | Metabion | Desalted |
| TSPAN8-99_R   | Pho |  | GCTAGACCACAGATATCTTCTAGACATNNNNCTGGAGCTGTCTGCGACTTT  | Metabion | Desalted |
| EDNRB-2862_R  | Pho |  | TTGGTGAGCAAAAGATTCAAAAAGTGCNNNNCTGGAGCTGTCTGCGACTTT  | Metabion | Desalted |
| NNMT-833_R    | Pho |  | AACGAAGGACTTTTCTCCCTGGTGGCGNNNNCTGGAGCTGTCTGCGACTTT  | Metabion | Desalted |
| CLDN4-221_R   | Pho |  | TCTGCCTCACCCGCTTCAGCCCAGGGCANNNNCTGGAGCTGTCTGCGACTTT | Metabion | Desalted |
| EFNA1-62_R    | Pho |  | GTTGCTGTGTCTGCTGATTTCTANNNNCTGGAGCTGTCTGCGACTTT      | Metabion | Desalted |
| COMP-138_R    | Pho |  | CCATCAGCTGCGGCAAGCCTATGGGACNNNNCTGGAGCTGTCTGCGACTTT  | Metabion | Desalted |
| CD55-1548_R   | Pho |  | ACCACTTCAGGTAACCCGCTTCTTANNNNCTGGAGCTGTCTGCGACTTT    | Metabion | Desalted |
| DKK1-175_R    | Pho |  | CTACAAGAACGGAAGTGTGATATGTTNNNNCTGGAGCTGTCTGCGACTTT   | Metabion | Desalted |
| SPP1-313_R    | Pho |  | AAAAGCTTCAGGGTTATGTCTATGTTNNNNCTGGAGCTGTCTGCGACTTT   | Metabion | Desalted |
| AQP3-170_R    | Pho |  | GTCAGGTCATAAGTTTCATGTTTCTNNNNCTGGAGCTGTCTGCGACTTT    | Metabion | Desalted |

|                  |     |  |                                                       |          |          |
|------------------|-----|--|-------------------------------------------------------|----------|----------|
| S100P-29_R       | Pho |  | TTCCCCTAGGCTGAGCCTGCTCATGTANNNNCTGGAGCTGTCTGCGACTTT   | Metabion | Desalted |
| APOD-94_R        | Pho |  | ACCAATCAACCACGACAAAGGAAGTTGNNNNCTGGAGCTGTCTGCGACTTT   | Metabion | Desalted |
| ACADSB-4320_R    | Pho |  | CTTTTAAACTTGGGAAATAAGCACCTGNNNNCTGGAGCTGTCTGCGACTTT   | Metabion | Desalted |
| C10orf10-368_R   | Pho |  | GGAAATCAGGCTGGGACTGATCAGAGGTNNNNCTGGAGCTGTCTGCGACTTT  | Metabion | Desalted |
| ABCC3-4217_R     | Pho |  | CAACGGAGCTGTGGCCGTGAAGATGCGNNNNCTGGAGCTGTCTGCGACTTT   | Metabion | Desalted |
| TCN1-40_R        | Pho |  | AACCTCCCCTTCTCTCTACATGTTGNNNNCTGGAGCTGTCTGCGACTTT     | Metabion | Desalted |
| IDO1-153_R       | Pho |  | GTAACAGAGCCACAAACTAATACTATGNNNNCTGGAGCTGTCTGCGACTTT   | Metabion | Desalted |
| GPX3-34_R        | Pho |  | TGGTCCAAGCTGGCTTGGAGACTCACCCGNNNNCTGGAGCTGTCTGCGACTTT | Metabion | Desalted |
| BCL6-1192_R      | Pho |  | AGTGTAACCTGCATTCCGTCACAAAANNNNCTGGAGCTGTCTGCGACTTT    | Metabion | Desalted |
| ANXA2-239_R      | Pho |  | TGAAACACTTTGCCTCCTGTGACTGNNNNCTGGAGCTGTCTGCGACTTT     | Metabion | Desalted |
| SFRP4-23_R       | Pho |  | TAGGTGGTTTCTTCACTGACAATACTGNNNNCTGGAGCTGTCTGCGACTTT   | Metabion | Desalted |
| SERPING1-81_R    | Pho |  | TAGCCCTTCTCCATGGCCCTGCCATGCNNNNCTGGAGCTGTCTGCGACTTT   | Metabion | Desalted |
| ARG2-34_R        | Pho |  | ACCTCACAGAAATGTTAACTGAGACANNNNCTGGAGCTGTCTGCGACTTT    | Metabion | Desalted |
| C1R-156_R        | Pho |  | GTAGTCCCATTGATGACTTTACCTGANNNNCTGGAGCTGTCTGCGACTTT    | Metabion | Desalted |
| C4BPA-161_R      | Pho |  | TAGCAAATCTACTGTCAATTTGGCAGTNNNNCTGGAGCTGTCTGCGACTTT   | Metabion | Desalted |
| GBP2-987_R       | Pho |  | GCAACTTCAGAGTGCAAACTGCCNNNNCTGGAGCTGTCTGCGACTTT       | Metabion | Desalted |
| LAMB3-174_R      | Pho |  | CAAAGATGGTGGAGATTGGCATGCCATNNNNCTGGAGCTGTCTGCGACTTT   | Metabion | Desalted |
| ARID5B-3946_R    | Pho |  | TCAAGCTGCCTTTCCATCTTCCAGCTNNNNCTGGAGCTGTCTGCGACTTT    | Metabion | Desalted |
| DPP4-427_R       | Pho |  | GACTTCTAAGTAAACCACAGCAGTTGNNNNCTGGAGCTGTCTGCGACTTT    | Metabion | Desalted |
| SLC1A1-123_R     | Pho |  | TTAGTGGCACTAGTTGGCAGAGCTGTTNNNNCTGGAGCTGTCTGCGACTTT   | Metabion | Desalted |
| HABP2-18_R       | Pho |  | TAGAGCTAGCTGACCTTTGGCCAAAANNNNCTGGAGCTGTCTGCGACTTT    | Metabion | Desalted |
| MAOA-59_R        | Pho |  | GTGTGCTTTGCCACTGAAGTAAGATTNNNNCTGGAGCTGTCTGCGACTTT    | Metabion | Desalted |
| PRUNE2-190_R     | Pho |  | GTTCCCTTAGAAACATTTAGATGTGCANNNNCTGGAGCTGTCTGCGACTTT   | Metabion | Desalted |
| DDX52-5_R        | Pho |  | CCTATCTGTTCTTTGTGTGTAAGAGTNNNNCTGGAGCTGTCTGCGACTTT    | Metabion | Desalted |
| CP-45_R          | Pho |  | ATTGTCATGTCTCCAACAACAGTGAACNNNNCTGGAGCTGTCTGCGACTTT   | Metabion | Desalted |
| MAP3K5-749_R     | Pho |  | AAGGGGAGGGATGCTGTGCACACTGTNNNNCTGGAGCTGTCTGCGACTTT    | Metabion | Desalted |
| ENPEP-314_R      | Pho |  | ACACATGTGCTGTAAATGAGAAATACNNNNCTGGAGCTGTCTGCGACTTT    | Metabion | Desalted |
| AOX1-528_R       | Pho |  | TCAATCCATCCAGCTAAATGGAATAGNNNNCTGGAGCTGTCTGCGACTTT    | Metabion | Desalted |
| PPIA-1638_R      | Pho |  | TCATTCTTCTGTAGCTCAGGAGAGCANNNNCTGGAGCTGTCTGCGACTTT    | Metabion | Desalted |
| CYC1-83_R        | Pho |  | CTAAGCCTCTCTTCCATCTGGAAGAAGANNNNCTGGAGCTGTCTGCGACTTT  | Metabion | Desalted |
| YWHAZ-4145_R     | Pho |  | TAACCGGCCTTCCAACCTTTGTCTGCCNNNNCTGGAGCTGTCTGCGACTTT   | Metabion | Desalted |
| GAPDH-58_R       | Pho |  | CCATGTAGACCCCTTGAAGAGGGGAGNNNNCTGGAGCTGTCTGCGACTTT    | Metabion | Desalted |
| HMBS-36_R        | Pho |  | GAAGTCCAAGCAACAGCCTTTGAATGTNNNNCTGGAGCTGTCTGCGACTTT   | Metabion | Desalted |
| TBP-343_R        | Pho |  | TCTGGGCAGCGCTGCCATTTATTTATNNNNCTGGAGCTGTCTGCGACTTT    | Metabion | Desalted |
| SDHA-333_R       | Pho |  | GGAAATATAGACCCGTGATCGACAAAANNNNCTGGAGCTGTCTGCGACTTT   | Metabion | Desalted |
| ACTB-5_R         | Pho |  | ACCAGTTGAATAAAAGTGCACACCTTANNNNCTGGAGCTGTCTGCGACTTT   | Metabion | Desalted |
| chr2:101085535_L |     |  | ACACGACGCTCTCCGATCTNNNNCTTAGCGCCAATATAACGTCCGGGAT     | Metabion | Desalted |
| chr2:11406302_L  |     |  | ACACGACGCTCTCCGATCTNNNNCTTTCTGTCTGTTTGAACGCAA         | Metabion | Desalted |
| chr2:120868127_L |     |  | ACACGACGCTCTCCGATCTNNNNCTGAGAGCTCAGTCTTCGCCACTTCAA    | Metabion | Desalted |
| chr2:135789621_L |     |  | ACACGACGCTCTCCGATCTNNNNCTTGCATCGGACCACAGAGGCGTAGAAC   | Metabion | Desalted |
| chr2:163017782_L |     |  | ACACGACGCTCTCCGATCTNNNNCTGCAGGTTGCAAACACCGTGGGAT      | Metabion | Desalted |
| chr2:178250714_L |     |  | ACACGACGCTCTCCGATCTNNNNCTTCCACAAAGCAGAAGCCGTCTCATA    | Metabion | Desalted |
| chr2:199463719_L |     |  | ACACGACGCTCTCCGATCTNNNNACAAAACGCCCTGGCGCGTGCAAAAT     | Metabion | Desalted |

|                  |  |                                                      |          |          |
|------------------|--|------------------------------------------------------|----------|----------|
| chr2:21608302_L  |  | ACACGACGCTCTCCGATCTNNNNNGCTGCATTTTCAGAGAAGGCCATCGTA  | Metabion | Desalted |
| chr2:227759997_L |  | ACACGACGCTCTCCGATCTNNNNNCTGGGCTTCTTTCTAACCCCGCTGAAT  | Metabion | Desalted |
| chr2:232372794_L |  | ACACGACGCTCTCCGATCTNNNNNGAATTGTGGACTGGACTGAGTACTCCT  | Metabion | Desalted |
| chr2:23401307_L  |  | ACACGACGCTCTCCGATCTNNNNCCTCTCTCCATTCAAGAAACCGTACTCT  | Metabion | Desalted |
| chr2:237660339_L |  | ACACGACGCTCTCCGATCTNNNNNGGAGATGGCTTGCCAACCTCACTGCGTA | Metabion | Desalted |
| chr2:240800370_L |  | ACACGACGCTCTCCGATCTNNNNNACCAATGCATTACTCAAGAGGCCCGAT  | Metabion | Desalted |
| chr2:24739837_L  |  | ACACGACGCTCTCCGATCTNNNNNTACGAACTGTGTGAACGGTACCCGAA   | Metabion | Desalted |
| chr2:3323538_L   |  | ACACGACGCTCTCCGATCTNNNNCCACGATGGACATGGGCCCTCAGCCAA   | Metabion | Desalted |
| chr2:59344696_L  |  | ACACGACGCTCTCCGATCTNNNNNTGCTTGAGTCCCAACTGGGGTGATAGC  | Metabion | Desalted |
| chr2:71830719_L  |  | ACACGACGCTCTCCGATCTNNNNNATCCCAGTCAGTTACAACGGCAGCAAT  | Metabion | Desalted |
| chr2:82461489_L  |  | ACACGACGCTCTCCGATCTNNNNNTATGATTCTCCTCTGACCCAGTCAACG  | Metabion | Desalted |
| chr2:94878207_L  |  | ACACGACGCTCTCCGATCTNNNNNTCCTGTACCACGGAAGCCGCACTACT   | Metabion | Desalted |
| chr2:98757977_L  |  | ACACGACGCTCTCCGATCTNNNNNTGACAGTGCCAGGAACGCCCGTGAAC   | Metabion | Desalted |
| chr2:100955305_L |  | ACACGACGCTCTCCGATCTNNNNNATGGAATGGGAAGGACAGCGACCCTTA  | Metabion | Desalted |
| chr2:102305387_L |  | ACACGACGCTCTCCGATCTNNNNNGTGGAACAATCTGTAAGATCGGACGTT  | Metabion | Desalted |
| chr2:103792960_L |  | ACACGACGCTCTCCGATCTNNNNCTATATCAGATATTAACGGGCCAGTT    | Metabion | Desalted |
| chr2:104792858_L |  | ACACGACGCTCTCCGATCTNNNNNTCCATTTAAGATGGGAAACCGGAGTTG  | Metabion | Desalted |
| chr2:108565153_L |  | ACACGACGCTCTCCGATCTNNNNCAGGAGGTAACTTTTCTTAGTTGGA     | Metabion | Desalted |
| chr2:112647051_L |  | ACACGACGCTCTCCGATCTNNNNNGTCTTACTGGGGGCCAAAGTGAGCGAA  | Metabion | Desalted |
| chr2:118224692_L |  | ACACGACGCTCTCCGATCTNNNNNAGAAAGCCCGAAAGGGAGGCGGTTAT   | Metabion | Desalted |
| chr2:125311103_L |  | ACACGACGCTCTCCGATCTNNNNNTTGGTTCTAAGTGCTACTCGCAAAGT   | Metabion | Desalted |
| chr2:135073864_L |  | ACACGACGCTCTCCGATCTNNNNCATCCCATGATGGGACCGTAAAAAACG   | Metabion | Desalted |
| chr2:145245523_L |  | ACACGACGCTCTCCGATCTNNNNNTGCCAACCCAAACAAGTATAATCAG    | Metabion | Desalted |
| chr2:152334950_L |  | ACACGACGCTCTCCGATCTNNNNAAAGTGACAATATGCTATCTCCAGAGAC  | Metabion | Desalted |
| chr2:15474108_L  |  | ACACGACGCTCTCCGATCTNNNNNTCACAAGCGGTAGTTTTTAGTAATGG   | Metabion | Desalted |
| chr2:167231349_L |  | ACACGACGCTCTCCGATCTNNNNNTTCTACATGTCTTGTAACGTCTCAT    | Metabion | Desalted |
| chr2:17124032_L  |  | ACACGACGCTCTCCGATCTNNNNNACAGGACAGCAAGAAACCCGTGGCAGT  | Metabion | Desalted |
| chr2:176099389_L |  | ACACGACGCTCTCCGATCTNNNNNCTCCGCTGCAACTTAAAGCCGGTAGAA  | Metabion | Desalted |
| chr2:177249947_L |  | ACACGACGCTCTCCGATCTNNNNNTCCTTAGGGGTGACTTTGACGGAAACCA | Metabion | Desalted |
| chr2:17931415_L  |  | ACACGACGCTCTCCGATCTNNNNNAAAGCCATGATGTGAGTACCGACTCCT  | Metabion | Desalted |
| chr2:190246811_L |  | ACACGACGCTCTCCGATCTNNNNNCAAGGTCACTTCTCAAGTACGGGACAC  | Metabion | Desalted |
| chr2:19240391_L  |  | ACACGACGCTCTCCGATCTNNNNTACTTTCAACATCAGAGCACGGGAGTC   | Metabion | Desalted |
| chr2:197051977_L |  | ACACGACGCTCTCCGATCTNNNNAAATTATCCCGTTTAAACTTCGGGGTT   | Metabion | Desalted |
| chr2:198064874_L |  | ACACGACGCTCTCCGATCTNNNNNGCAAATAATTTCAAGTGGACCGTTTGGT | Metabion | Desalted |
| chr2:202868115_L |  | ACACGACGCTCTCCGATCTNNNNNTACTGAAATGTACACTTCGAAACG     | Metabion | Desalted |
| chr2:218819411_L |  | ACACGACGCTCTCCGATCTNNNNNAAAGAAACAACAGCGGATTAAGGAT    | Metabion | Desalted |
| chr2:223957413_L |  | ACACGACGCTCTCCGATCTNNNNNGTTACGGGGACACTGGCCCGACTACTT  | Metabion | Desalted |
| chr2:233308485_L |  | ACACGACGCTCTCCGATCTNNNNNCAAGATATGCTTAATTTAGACCGCTA   | Metabion | Desalted |
| chr2:235577831_L |  | ACACGACGCTCTCCGATCTNNNNNAAAGGCCATGTCTGCTCGTGGGACCT   | Metabion | Desalted |
| chr2:2795811_L   |  | ACACGACGCTCTCCGATCTNNNNCCAGAAGACATTTAAACTGATCAGTG    | Metabion | Desalted |
| chr2:39665236_L  |  | ACACGACGCTCTCCGATCTNNNNCCAGATCAAGATTCCAAGGAGTTAAAC   | Metabion | Desalted |
| chr2:42844903_L  |  | ACACGACGCTCTCCGATCTNNNNNGGACCAGTTGCCATCGGGGCTTAGC    | Metabion | Desalted |
| chr2:46512548_L  |  | ACACGACGCTCTCCGATCTNNNNNTCCATAATCTTCAGTCGTTGGGTTTGC  | Metabion | Desalted |

|                  |     |  |                                                      |          |          |
|------------------|-----|--|------------------------------------------------------|----------|----------|
| chr2:47653669_L  |     |  | ACACGACGCTCTCCGATCTNNNNACTTATTGCTCACGATTGGCATAACCAT  | Metabion | Desalted |
| chr2:68077544_L  |     |  | ACACGACGCTCTCCGATCTNNNNCAGCCAAGATCAGCAGGTAGTACAACCT  | Metabion | Desalted |
| chr2:70411829_L  |     |  | ACACGACGCTCTCCGATCTNNNNCAAATGCCTGCTGCTAAGGATAGACGA   | Metabion | Desalted |
| chr2:78404591_L  |     |  | ACACGACGCTCTCCGATCTNNNNNTGAATGCCTGTCTGCAACGGCCTTGAT  | Metabion | Desalted |
| chr2:88350766_L  |     |  | ACACGACGCTCTCCGATCTNNNNGCATTATGCAAAATAAAGCCGCCTTGT   | Metabion | Desalted |
| chr2:96661714_L  |     |  | ACACGACGCTCTCCGATCTNNNNNTCTCAAGTCAGCGGTAGTCCCGATCA   | Metabion | Desalted |
| chr2:98757977_L  |     |  | ACACGACGCTCTCCGATCTNNNNCTGACAGTGCCAGGAACGCCGTGAAC    | Metabion | Desalted |
| chr2:115162453_L |     |  | ACACGACGCTCTCCGATCTNNNNCTGGCCAAAGCGACCCGAGCAGGCGAA   | Metabion | Desalted |
| chr2:20646683_L  |     |  | ACACGACGCTCTCCGATCTNNNNGCCAGCCCTCTGCCAACGGCACCGAGT   | Metabion | Desalted |
| chr2:238789650_L |     |  | ACACGACGCTCTCCGATCTNNNNNTAGTTACGCGGGAGAAACCGATTCTAA  | Metabion | Desalted |
| chr2:101085535_R | Pho |  | AACGATGCCCAAGCATGAGCAAGACAANNNNCTGGAGCTGTCTGCGACTTT  | Metabion | Desalted |
| chr2:11406302_R  | Pho |  | ACGACATCTGCTTCCCCTCCCTGAAANNNNCTGGAGCTGTCTGCGACTTT   | Metabion | Desalted |
| chr2:120868127_R | Pho |  | TTCCCCGCGGTTTGAGCTGCAAGGAGNNNNCTGGAGCTGTCTGCGACTTT   | Metabion | Desalted |
| chr2:135789621_R | Pho |  | TTGCTGATGCTTTGGGGATCCTTGGCNNNNCTGGAGCTGTCTGCGACTTT   | Metabion | Desalted |
| chr2:163017782_R | Pho |  | AAGCCTCGTATCTGGGCCAACAGCAGANNNNCTGGAGCTGTCTGCGACTTT  | Metabion | Desalted |
| chr2:178250714_R | Pho |  | TCGTGCACTATAAATGAGGACTTCCCTNNNNCTGGAGCTGTCTGCGACTTT  | Metabion | Desalted |
| chr2:199463719_R | Pho |  | ACGAACGCCACAGTTTGTCCCAACCCNNNNCTGGAGCTGTCTGCGACTTT   | Metabion | Desalted |
| chr2:21608302_R  | Pho |  | TTCCGTCCCAATGGTTGTGGGCTTGTNNNNCTGGAGCTGTCTGCGACTTT   | Metabion | Desalted |
| chr2:227759997_R | Pho |  | TCCTACACGGACCTCAGACGGATGCAGNNNNCTGGAGCTGTCTGCGACTTT  | Metabion | Desalted |
| chr2:232372794_R | Pho |  | TACGTGGACCCTTTTAGGGACCACGAANNNNCTGGAGCTGTCTGCGACTTT  | Metabion | Desalted |
| chr2:23401307_R  | Pho |  | ATACACCCCGGTCACCCCTAAGTCNNNNCTGGAGCTGTCTGCGACTTT     | Metabion | Desalted |
| chr2:237660339_R | Pho |  | GTGTAGATGGGGGATAGGGACCCNNNNCTGGAGCTGTCTGCGACTTT      | Metabion | Desalted |
| chr2:240800370_R | Pho |  | ACCACGCCGCACTGTGTGTGAAGGAATNNNNCTGGAGCTGTCTGCGACTTT  | Metabion | Desalted |
| chr2:24739837_R  | Pho |  | ACCTGATCAAAACCCAGTCACATTGCTNNNNCTGGAGCTGTCTGCGACTTT  | Metabion | Desalted |
| chr2:3323538_R   | Pho |  | CGTTCGCCGTGTTGTCAGCCTCCATGANNNNNCTGGAGCTGTCTGCGACTTT | Metabion | Desalted |
| chr2:59344696_R  | Pho |  | ATGCTACCGTCTTAATGTCCCCCACNNNNCTGGAGCTGTCTGCGACTTT    | Metabion | Desalted |
| chr2:71830719_R  | Pho |  | CGAAATCCAGCTTCTGATGTGAGATCTNNNNCTGGAGCTGTCTGCGACTTT  | Metabion | Desalted |
| chr2:82461489_R  | Pho |  | TTACACCGCTTTGCTTCTGGACCTATANNNNCTGGAGCTGTCTGCGACTTT  | Metabion | Desalted |
| chr2:94878207_R  | Pho |  | ACTTGTGCAAAACCACAGTCACTACANNNNCTGGAGCTGTCTGCGACTTT   | Metabion | Desalted |
| chr2:98757977_R  | Pho |  | GCTTTCGTGGTTGCTATGTGAAAACCTTNNNNCTGGAGCTGTCTGCGACTTT | Metabion | Desalted |
| chr2:100955305_R | Pho |  | CTGTACCCGCTTCCCTGGGCCATGATGNNNNCTGGAGCTGTCTGCGACTTT  | Metabion | Desalted |
| chr2:102305387_R | Pho |  | TCCTCTGATAACAGAACTCCAGAGTTNNNNCTGGAGCTGTCTGCGACTTT   | Metabion | Desalted |
| chr2:103792960_R | Pho |  | AACGACAGGCACACCTTAAGTCTAGANNNNCTGGAGCTGTCTGCGACTTT   | Metabion | Desalted |
| chr2:104792858_R | Pho |  | CACATATCGCCTATGCCACATTACAANNNNCTGGAGCTGTCTGCGACTTT   | Metabion | Desalted |
| chr2:108565153_R | Pho |  | TACCGTCTTCCGTTCCACAGAGTTTTTNNNNCTGGAGCTGTCTGCGACTTT  | Metabion | Desalted |
| chr2:112647051_R | Pho |  | ACCATCCGGAAGGGCTTGATTGACGTGNNNNCTGGAGCTGTCTGCGACTTT  | Metabion | Desalted |
| chr2:118224692_R | Pho |  | TTACGACCGCGGGTTGGAGTCTGGCANNNNCTGGAGCTGTCTGCGACTTT   | Metabion | Desalted |
| chr2:125311103_R | Pho |  | CTTACCCGATTTACACTGCTGGATTNNNNCTGGAGCTGTCTGCGACTTT    | Metabion | Desalted |
| chr2:135073864_R | Pho |  | TCTGTTGGGAGCGCAACTGCAGTTTNNNNCTGGAGCTGTCTGCGACTTT    | Metabion | Desalted |
| chr2:145245523_R | Pho |  | CGATGATCCGAGCAGACCAAGCTGTCTNNNNCTGGAGCTGTCTGCGACTTT  | Metabion | Desalted |
| chr2:152334950_R | Pho |  | TACGGATCGCCTTTGCTGCAAATGGTCNNNNCTGGAGCTGTCTGCGACTTT  | Metabion | Desalted |
| chr2:15474108_R  | Pho |  | TTCGTGGGCGTTTCCGTGGTGGTGAANNNNCTGGAGCTGTCTGCGACTTT   | Metabion | Desalted |
| chr2:167231349_R | Pho |  | GGAACATACGTTACCAAAAATAAGCCNNNNCTGGAGCTGTCTGCGACTTT   | Metabion | Desalted |

|                  |     |  |                                                      |          |          |
|------------------|-----|--|------------------------------------------------------|----------|----------|
| chr2:17124032_R  | Pho |  | ATAGGCCGAAATGGGTGTTTATTCTGGTNNNNCTGGAGCTGTCTGCGACTTT | Metabion | Desalted |
| chr2:176099389_R | Pho |  | GCAAGCCGGGCCAGAAAGCCTGCGGANNNCTGGAGCTGTCTGCGACTTT    | Metabion | Desalted |
| chr2:177249947_R | Pho |  | AACTCTTCGGTTTTGCAAATTACCTCCNNNNCTGGAGCTGTCTGCGACTTT  | Metabion | Desalted |
| chr2:17931415_R  | Pho |  | CGTTTTGAAGAGTCGTCTCTGTTTGAGANNNCTGGAGCTGTCTGCGACTTT  | Metabion | Desalted |
| chr2:190246811_R | Pho |  | GTATCTTAGCTGCAGGTGTGGCTGGATNNNNCTGGAGCTGTCTGCGACTTT  | Metabion | Desalted |
| chr2:19240391_R  | Pho |  | TGTACTCCGCTTTTGGCACTTCAGCAGNNNNCTGGAGCTGTCTGCGACTTT  | Metabion | Desalted |
| chr2:197051977_R | Pho |  | ACCATCCGGGAGTGCAGAGCTCTGACNNNNCTGGAGCTGTCTGCGACTTT   | Metabion | Desalted |
| chr2:198064874_R | Pho |  | ATAGGGAAGCTTATGGAGACAGAAGCTNNNNCTGGAGCTGTCTGCGACTTT  | Metabion | Desalted |
| chr2:202868115_R | Pho |  | GTTGTTTGGGTTTGTAGCCAAAGTANNNCTGGAGCTGTCTGCGACTTT     | Metabion | Desalted |
| chr2:218819411_R | Pho |  | TGTTGGTTCGGCACAGCAGATAGACATNNNNCTGGAGCTGTCTGCGACTTT  | Metabion | Desalted |
| chr2:223957413_R | Pho |  | TCGTTCCGCTTCCATCGTTTTCTCENNNCTGGAGCTGTCTGCGACTTT     | Metabion | Desalted |
| chr2:233308485_R | Pho |  | AGATGGCCTCTAATTGTAACAAGAGNNNNCTGGAGCTGTCTGCGACTTT    | Metabion | Desalted |
| chr2:235577831_R | Pho |  | GATAGTTCGCCTTTGTACGGATGAAAANNNCTGGAGCTGTCTGCGACTTT   | Metabion | Desalted |
| chr2:2795811_R   | Pho |  | TACGCGGAGAGTAGCCAAAGACTCAGNNNNCTGGAGCTGTCTGCGACTTT   | Metabion | Desalted |
| chr2:39665236_R  | Pho |  | GCTACCACGCAGCCCGACCTGGATGGNNNNCTGGAGCTGTCTGCGACTTT   | Metabion | Desalted |
| chr2:42844903_R  | Pho |  | ATCGACTCTCTTCTCTGGCAGATGTTNNNNCTGGAGCTGTCTGCGACTTT   | Metabion | Desalted |
| chr2:46512548_R  | Pho |  | ACGAGGCGTCTTTCTCAATGTTAAACNNNNCTGGAGCTGTCTGCGACTTT   | Metabion | Desalted |
| chr2:47653669_R  | Pho |  | TAGGGGATTGTTGGCCATCCCTCTTCNNNNCTGGAGCTGTCTGCGACTTT   | Metabion | Desalted |
| chr2:68077544_R  | Pho |  | TAGCCGAACCTTCAGGCTCCAGAGAANNNCTGGAGCTGTCTGCGACTTT    | Metabion | Desalted |
| chr2:70411829_R  | Pho |  | CTCACCCGGTCTTGGGAATGCTTATANNNCTGGAGCTGTCTGCGACTTT    | Metabion | Desalted |
| chr2:78404591_R  | Pho |  | CATACTACCAGGGTTTGCACAGCCTTTNNNNCTGGAGCTGTCTGCGACTTT  | Metabion | Desalted |
| chr2:88350766_R  | Pho |  | TTCCCGCCTTGGTAAACCCGGCTTCNNNNCTGGAGCTGTCTGCGACTTT    | Metabion | Desalted |
| chr2:96661714_R  | Pho |  | ACATGGCTTACTTACAGCTCTTCTACTNNNNCTGGAGCTGTCTGCGACTTT  | Metabion | Desalted |
| chr2:98757977_R  | Pho |  | TGCTTTCGTGGTTGCATGTGAAAACCTNNNNCTGGAGCTGTCTGCGACTTT  | Metabion | Desalted |
| chr2:115162453_R | Pho |  | TGACCTTTAGGCGGACGGGTTTTCCNNNNCTGGAGCTGTCTGCGACTTT    | Metabion | Desalted |
| chr2:20646683_R  | Pho |  | TCACGCAGTGTGCACGCGCGCCTGGTNNNNCTGGAGCTGTCTGCGACTTT   | Metabion | Desalted |
| chr2:238789650_R | Pho |  | GGTTGCCGTATAATTAGCAGGGTCTCCNNNNCTGGAGCTGTCTGCGACTTT  | Metabion | Desalted |
| chr21:14788887_L |     |  | ACACGACGCTCTCCGATCTNNNNAACCACTTTCCTTCTGTGGTAGCCGAT   | Metabion | Desalted |
| chr21:15967507_L |     |  | ACACGACGCTCTCCGATCTNNNNCAACCTGAGGCTTGTGATCGGCATGAA   | Metabion | Desalted |
| chr21:20262845_L |     |  | ACACGACGCTCTCCGATCTNNNNGATACATCTGAGAGATACGCGGAGATA   | Metabion | Desalted |
| chr21:25447962_L |     |  | ACACGACGCTCTCCGATCTNNNNCAAAACTCAATGCCAAGTGGTTGAACG   | Metabion | Desalted |
| chr21:27008952_L |     |  | ACACGACGCTCTCCGATCTNNNNTCATACTTGTCTCCCCAGTCCCGCTCA   | Metabion | Desalted |
| chr21:29364391_L |     |  | ACACGACGCTCTCCGATCTNNNNCATGAGAGAAGGGCCAGTACCTTTTGC   | Metabion | Desalted |
| chr21:31658073_L |     |  | ACACGACGCTCTCCGATCTNNNNTTGTTCAAGGTGTGACGACCATCCTACG  | Metabion | Desalted |
| chr21:32848925_L |     |  | ACACGACGCTCTCCGATCTNNNNTAATGCTGCAAATACCCGTGCAAGACT   | Metabion | Desalted |
| chr21:33550726_L |     |  | ACACGACGCTCTCCGATCTNNNNGTAGCAATGGAGTTGACCGAACAACT    | Metabion | Desalted |
| chr21:34761453_L |     |  | ACACGACGCTCTCCGATCTNNNNTTGGTCCTGGTCTCAGTGGAAACCCGTT  | Metabion | Desalted |
| chr21:36460959_L |     |  | ACACGACGCTCTCCGATCTNNNNAAGCAGGCTGTGGGACTCACACGTAG    | Metabion | Desalted |
| chr21:39062244_L |     |  | ACACGACGCTCTCCGATCTNNNNCATGAGTCCCATGCCTGATCCAGAC     | Metabion | Desalted |
| chr21:40995931_L |     |  | ACACGACGCTCTCCGATCTNNNNCTCCTCTAGCTGATGCTGTGGCAGTC    | Metabion | Desalted |
| chr21:41943683_L |     |  | ACACGACGCTCTCCGATCTNNNNTGCAAGTGAGCAAGCGATGAGGTTACG   | Metabion | Desalted |
| chr21:42360636_L |     |  | ACACGACGCTCTCCGATCTNNNNCCCCCTATGTCTCATGGCCACATAGA    | Metabion | Desalted |
| chr21:43812691_L |     |  | ACACGACGCTCTCCGATCTNNNNCCACTGCATGTCAGCGCCAGCCGTAG    | Metabion | Desalted |

|                  |  |  |                                                      |          |          |
|------------------|--|--|------------------------------------------------------|----------|----------|
| chr21:44527351_L |  |  | ACACGACGCTCTCCGATCTNNNNATGAGACGAACTTCTCTTCGGTCCACT   | Metabion | Desalted |
| chr21:44855283_L |  |  | ACACGACGCTCTCCGATCTNNNNCCAAACGACAGCGCACGGTGGTGTAAAC  | Metabion | Desalted |
| chr21:45828339_L |  |  | ACACGACGCTCTCCGATCTNNNNNGCCCAGACTCTTAATACGGTGAGTTAC  | Metabion | Desalted |
| chr21:46415136_L |  |  | ACACGACGCTCTCCGATCTNNNNNGTTCCTGGGTCCACACTGCGTGCACCT  | Metabion | Desalted |
| chr21:14853307_L |  |  | ACACGACGCTCTCCGATCTNNNNGAATGAGTTCTCACTCTACGAGTTCAAC  | Metabion | Desalted |
| chr21:15494467_L |  |  | ACACGACGCTCTCCGATCTNNNNCCCTCCAGTTACCGTGGGTATTCAAC    | Metabion | Desalted |
| chr21:16486166_L |  |  | ACACGACGCTCTCCGATCTNNNNAGATGTGAAGACAGCACACCGCTAGGT   | Metabion | Desalted |
| chr21:18477249_L |  |  | ACACGACGCTCTCCGATCTNNNNNTGTTTGAGAATTACTGCGTTACACCAA  | Metabion | Desalted |
| chr21:18745264_L |  |  | ACACGACGCTCTCCGATCTNNNNNTCTTCAATTCACAAACTAACGCAGTCA  | Metabion | Desalted |
| chr21:23049826_L |  |  | ACACGACGCTCTCCGATCTNNNNNATCTCCTTGCATGATCCAAGCACCGTT  | Metabion | Desalted |
| chr21:24075508_L |  |  | ACACGACGCTCTCCGATCTNNNNNAAATCTAAAGATCTCTGCCTTCGCTCT  | Metabion | Desalted |
| chr21:24844831_L |  |  | ACACGACGCTCTCCGATCTNNNNNATCAGTAGGATAAACAACCGACGTTCT  | Metabion | Desalted |
| chr21:25930186_L |  |  | ACACGACGCTCTCCGATCTNNNNNCATTTTGTAGTTTCAGTGAGTCGTGTC  | Metabion | Desalted |
| chr21:26381471_L |  |  | ACACGACGCTCTCCGATCTNNNNNTAAGTGAACCACTGACATATTGGAGTT  | Metabion | Desalted |
| chr21:26966048_L |  |  | ACACGACGCTCTCCGATCTNNNNNGGCACGAAGCCAGCAATGCCACCGAA   | Metabion | Desalted |
| chr21:29073899_L |  |  | ACACGACGCTCTCCGATCTNNNNNACCGTAGTCAGTAGTCACGGCGTTAGA  | Metabion | Desalted |
| chr21:31120259_L |  |  | ACACGACGCTCTCCGATCTNNNNNTGTGCAAGAGCGCGACCTAAGGGGACA  | Metabion | Desalted |
| chr21:31956365_L |  |  | ACACGACGCTCTCCGATCTNNNNNGTGCCAGAAGGTTTCCATCCATAAAG   | Metabion | Desalted |
| chr21:32338779_L |  |  | ACACGACGCTCTCCGATCTNNNNNGCATCACGTAGACCACCGGGAGCTGGA  | Metabion | Desalted |
| chr21:33024001_L |  |  | ACACGACGCTCTCCGATCTNNNNNAATTGAACGGTTATGGGTCATCCTTGT  | Metabion | Desalted |
| chr21:33127293_L |  |  | ACACGACGCTCTCCGATCTNNNNNAGAAAAGACTGCCGTGGGGATCGGTTT  | Metabion | Desalted |
| chr21:33915819_L |  |  | ACACGACGCTCTCCGATCTNNNNNGCGCGCTTGGCGTAACCGCTAGGTTT   | Metabion | Desalted |
| chr21:34074498_L |  |  | ACACGACGCTCTCCGATCTNNNNNGGATTAAGCGAACCAGCGGCCCTT     | Metabion | Desalted |
| chr21:35048563_L |  |  | ACACGACGCTCTCCGATCTNNNNNAGCACAACTTACTCGCACTTGACAAAG  | Metabion | Desalted |
| chr21:35205270_L |  |  | ACACGACGCTCTCCGATCTNNNNNCTAGCAGTTAGACGGTCCATCTTTCTC  | Metabion | Desalted |
| chr21:36708786_L |  |  | ACACGACGCTCTCCGATCTNNNNCAAATCGATATCCCGTTTGGCCACGA    | Metabion | Desalted |
| chr21:36881369_L |  |  | ACACGACGCTCTCCGATCTNNNNNTGTCTAACAGGGGCATGGAATCATT    | Metabion | Desalted |
| chr21:38759623_L |  |  | ACACGACGCTCTCCGATCTNNNNNATTTTCACTTAAACACAGCCCTGTCTG  | Metabion | Desalted |
| chr21:39444854_L |  |  | ACACGACGCTCTCCGATCTNNNNNTGGCTTGGGGAATTATTGAGCGCTAT   | Metabion | Desalted |
| chr21:40178954_L |  |  | ACACGACGCTCTCCGATCTNNNNCGTTGCTGGGCTCGCTTTGCCAATCC    | Metabion | Desalted |
| chr21:41506859_L |  |  | ACACGACGCTCTCCGATCTNNNNNGCATTGCCTTGGGCGCGATGCGCTCA   | Metabion | Desalted |
| chr21:41768876_L |  |  | ACACGACGCTCTCCGATCTNNNNCCTCTGCGGACTTTGAAGTGCTTTACC   | Metabion | Desalted |
| chr21:42138015_L |  |  | ACACGACGCTCTCCGATCTNNNNNACACACCCACTGGACTGGCTCCACGAT  | Metabion | Desalted |
| chr21:42254610_L |  |  | ACACGACGCTCTCCGATCTNNNNCGTGGCTTTGCCACATGATCACGAAAA   | Metabion | Desalted |
| chr21:43273281_L |  |  | ACACGACGCTCTCCGATCTNNNNNGCCTTTATCAGGGCGTGAATCCCACGA  | Metabion | Desalted |
| chr21:43319469_L |  |  | ACACGACGCTCTCCGATCTNNNNNACATCTGCTCCGGGCGATGTGACTCAG  | Metabion | Desalted |
| chr21:44326763_L |  |  | ACACGACGCTCTCCGATCTNNNNNGAAGATGCTGGCACAATACCGCATCAG  | Metabion | Desalted |
| chr21:44708346_L |  |  | ACACGACGCTCTCCGATCTNNNNNGCACACAGCCTTCCAGGAGCGGACTTG  | Metabion | Desalted |
| chr21:44771421_L |  |  | ACACGACGCTCTCCGATCTNNNNGAACCTGCCGCTCCCGTCAATCGCCACAT | Metabion | Desalted |
| chr21:45056373_L |  |  | ACACGACGCTCTCCGATCTNNNNCTTCTGTCACCTTCCAGCGCTTTGTAT   | Metabion | Desalted |
| chr21:45254594_L |  |  | ACACGACGCTCTCCGATCTNNNNTTTTCTTTGGCCGCGTTGCGGGAAAA    | Metabion | Desalted |
| chr21:45982832_L |  |  | ACACGACGCTCTCCGATCTNNNNNGAACACGGGTGCGACGGCTCAACCT    | Metabion | Desalted |
| chr21:46125933_L |  |  | ACACGACGCTCTCCGATCTNNNNCCTCAAGTTTGCCTACGACCGCTCAT    | Metabion | Desalted |

|                  |     |  |                                                      |          |          |
|------------------|-----|--|------------------------------------------------------|----------|----------|
| chr21:46370078_L |     |  | ACACGACGCTCTCCGATCTNNNNCTTCATCAGAGCGTTCAGGCACTTACG   | Metabion | Desalted |
| chr21:14788887_R | Pho |  | TTCCCACTGATTCTGTCTCCTGCTATNNNNCTGGAGCTGTCTGCGACTTT   | Metabion | Desalted |
| chr21:15967507_R | Pho |  | AGGTAGCGGCAGTCTTATGGGACTGAGNNNNCTGGAGCTGTCTGCGACTTT  | Metabion | Desalted |
| chr21:20262845_R | Pho |  | CATCTCCGAGTTTGAATCACCACACANNNNCTGGAGCTGTCTGCGACTTT   | Metabion | Desalted |
| chr21:25447962_R | Pho |  | CTTAGCCACAGAATACTAGACTCTNNNNCTGGAGCTGTCTGCGACTTT     | Metabion | Desalted |
| chr21:27008952_R | Pho |  | TGTCCCTGTATACCAAATGGCCAGAACNNNNCTGGAGCTGTCTGCGACTTT  | Metabion | Desalted |
| chr21:29364391_R | Pho |  | GAAGTCACTAGGTGGACCTTGAGGAATNNNNCTGGAGCTGTCTGCGACTTT  | Metabion | Desalted |
| chr21:31658073_R | Pho |  | AAGGCACCACCCAGGCATCATTAGACCNNNNCTGGAGCTGTCTGCGACTTT  | Metabion | Desalted |
| chr21:32848925_R | Pho |  | TAGACGCTGATAAGAGAGGAGGTGGTANNNNCTGGAGCTGTCTGCGACTTT  | Metabion | Desalted |
| chr21:33550726_R | Pho |  | GTGACGACGACAGAGTTGGAGCAGCCTNNNNCTGGAGCTGTCTGCGACTTT  | Metabion | Desalted |
| chr21:34761453_R | Pho |  | TTGTTTCGATTGTCCCTGACCTGGCCTNNNNCTGGAGCTGTCTGCGACTTT  | Metabion | Desalted |
| chr21:36460959_R | Pho |  | TCGTTACGCCTGTACCCGCTGTGCGTGNNNNCTGGAGCTGTCTGCGACTTT  | Metabion | Desalted |
| chr21:39062244_R | Pho |  | GTTCTACCCACAGCTGCCACGGCAGGNNNNCTGGAGCTGTCTGCGACTTT   | Metabion | Desalted |
| chr21:40995931_R | Pho |  | TAGCGGACAAGAGCAACATCATCACANNNNCTGGAGCTGTCTGCGACTTT   | Metabion | Desalted |
| chr21:41943683_R | Pho |  | CTGTGGCTATTTCTCAAGAATGCCAANNNNCTGGAGCTGTCTGCGACTTT   | Metabion | Desalted |
| chr21:42360636_R | Pho |  | ATTGCACGGCCACTTCTGGCTAAAAGANNNNCTGGAGCTGTCTGCGACTTT  | Metabion | Desalted |
| chr21:43812691_R | Pho |  | ACGAGGGTTTGGGAGGCATGGCTGGGCNNNNCTGGAGCTGTCTGCGACTTT  | Metabion | Desalted |
| chr21:44527351_R | Pho |  | TGTAGACGGCGGATGTGGCTTTCGATNNNNCTGGAGCTGTCTGCGACTTT   | Metabion | Desalted |
| chr21:44855283_R | Pho |  | TGCTAGACACGCCCTTCCGTGTCCCTCNNNNCTGGAGCTGTCTGCGACTTT  | Metabion | Desalted |
| chr21:45828339_R | Pho |  | TCTCGCTCTGGATCTGCCCTCGTGCNNNNCTGGAGCTGTCTGCGACTTT    | Metabion | Desalted |
| chr21:46415136_R | Pho |  | CATTGGCGTTTAGAGCCTGAAAGATTCNNNNCTGGAGCTGTCTGCGACTTT  | Metabion | Desalted |
| chr21:14853307_R | Pho |  | GTGATGTACTGGCTCCCTCTTGTCTNNNNCTGGAGCTGTCTGCGACTTT    | Metabion | Desalted |
| chr21:15494467_R | Pho |  | TTGTGCGCGCTCGACTTCCACAGGNNNNCTGGAGCTGTCTGCGACTTT     | Metabion | Desalted |
| chr21:16486166_R | Pho |  | CTTGCACGGGCTGCTGTAACCATTCNNNNCTGGAGCTGTCTGCGACTTT    | Metabion | Desalted |
| chr21:18477249_R | Pho |  | TTGTGACTCACTCCAGCGGCTGGATANNNNCTGGAGCTGTCTGCGACTTT   | Metabion | Desalted |
| chr21:18745264_R | Pho |  | GTGACTCGATTTAGCCGGTTGCAGANNNNCTGGAGCTGTCTGCGACTTT    | Metabion | Desalted |
| chr21:23049826_R | Pho |  | ACTAGGCTCCACCTCCAACACCGGGANNNNCTGGAGCTGTCTGCGACTTT   | Metabion | Desalted |
| chr21:24075508_R | Pho |  | CCTATTGGGACTTGTATAAGGCGATCANNNNCTGGAGCTGTCTGCGACTTT  | Metabion | Desalted |
| chr21:24844831_R | Pho |  | TCAGCGTACCGTGTGTGTCAGATGATTCNNNNCTGGAGCTGTCTGCGACTTT | Metabion | Desalted |
| chr21:25930186_R | Pho |  | CCTAAAGCCGTGTCTGTGTGACCAGCANNNNCTGGAGCTGTCTGCGACTTT  | Metabion | Desalted |
| chr21:26381471_R | Pho |  | ACGACAGTTGCCTGTTTTGACCTTGACNNNNCTGGAGCTGTCTGCGACTTT  | Metabion | Desalted |
| chr21:26966048_R | Pho |  | CCATCTCGCTCCAGGTCCAAGAGGAACNNNNCTGGAGCTGTCTGCGACTTT  | Metabion | Desalted |
| chr21:29073899_R | Pho |  | TTTTTGCGTTTTTGTCTGGAAGCCANNNNCTGGAGCTGTCTGCGACTTT    | Metabion | Desalted |
| chr21:31120259_R | Pho |  | TTCTTGTGACGGTACAGGAGGTTGGGNNNNCTGGAGCTGTCTGCGACTTT   | Metabion | Desalted |
| chr21:31956365_R | Pho |  | CGATGTGTCCAAGTCTCTTTGTATGCNNNNCTGGAGCTGTCTGCGACTTT   | Metabion | Desalted |
| chr21:32338779_R | Pho |  | TGAGCTTCGTGCGCACGGAGCTTCTGNNNNCTGGAGCTGTCTGCGACTTT   | Metabion | Desalted |
| chr21:33024001_R | Pho |  | AACCGTTGGACGACATAACACCAGCTNNNNCTGGAGCTGTCTGCGACTTT   | Metabion | Desalted |
| chr21:33127293_R | Pho |  | CTGTTCCGAGAGTACATAGCAGAGTANNNNCTGGAGCTGTCTGCGACTTT   | Metabion | Desalted |
| chr21:33915819_R | Pho |  | TCTGGGAAGTGTAGGCGTAGGCGCTCANNNNCTGGAGCTGTCTGCGACTTT  | Metabion | Desalted |
| chr21:34074498_R | Pho |  | TCAGGTGACGGCGTGGCCAAGGACAGNNNNCTGGAGCTGTCTGCGACTTT   | Metabion | Desalted |
| chr21:35048563_R | Pho |  | TTCTCACGCAACGACTGAACACTCCAANNNNCTGGAGCTGTCTGCGACTTT  | Metabion | Desalted |
| chr21:35205270_R | Pho |  | TATCAGCCGTTTAGCAGCCTCTACTTTNNNNCTGGAGCTGTCTGCGACTTT  | Metabion | Desalted |
| chr21:36708786_R | Pho |  | GAATGGCGATTTCAAAGCAGATTAGATNNNNCTGGAGCTGTCTGCGACTTT  | Metabion | Desalted |



|                    |     |  |                                                      |          |          |
|--------------------|-----|--|------------------------------------------------------|----------|----------|
| chr21:36881369_R   | Pho |  | GACTTTCCTGGGTTCCAGAAGGAAACNNNNCTGGAGCTGTCTGCGACTTT   | Metabion | Desalted |
| chr21:38759623_R   | Pho |  | CGATGCCAACAGACTTTAGCTCAATTTNNNNCTGGAGCTGTCTGCGACTTT  | Metabion | Desalted |
| chr21:39444854_R   | Pho |  | CTTGGACGAGCTGTGTTTGAGATGCCGNNNNCTGGAGCTGTCTGCGACTTT  | Metabion | Desalted |
| chr21:40178954_R   | Pho |  | GGTTCTTGGCGTACATGCCGATGCTGTNNNNCTGGAGCTGTCTGCGACTTT  | Metabion | Desalted |
| chr21:41506859_R   | Pho |  | TCTTCCC CGGG ACCACTGCACAGTNNNNCTGGAGCTGTCTGCGACTTT   | Metabion | Desalted |
| chr21:41768876_R   | Pho |  | GATTCACATGACAACCTGGTAAAACGAANNNNCTGGAGCTGTCTGCGACTTT | Metabion | Desalted |
| chr21:42138015_R   | Pho |  | ACCAGCGGCAGTGCTATATGGGTGACNNNNCTGGAGCTGTCTGCGACTTT   | Metabion | Desalted |
| chr21:42254610_R   | Pho |  | TGGAGGCGGTGCGATGAGAAGGCCCTTANNNNCTGGAGCTGTCTGCGACTTT | Metabion | Desalted |
| chr21:43273281_R   | Pho |  | ACACGGCTCCACCCTGAGGATCTCCCNNNNCTGGAGCTGTCTGCGACTTT   | Metabion | Desalted |
| chr21:43319469_R   | Pho |  | CTGTGGACGATGACGACATGATCCTGANNNNNCTGGAGCTGTCTGCGACTTT | Metabion | Desalted |
| chr21:44326763_R   | Pho |  | TATGGCCGCCTACGTGTACAGGGAGCTNNNNCTGGAGCTGTCTGCGACTTT  | Metabion | Desalted |
| chr21:44708346_R   | Pho |  | GAGACCTCGCCAAGGACCAGGACTCCNNNNCTGGAGCTGTCTGCGACTTT   | Metabion | Desalted |
| chr21:44771421_R   | Pho |  | TTTGGACGCATCCACGTTAGCTCCACTNNNNCTGGAGCTGTCTGCGACTTT  | Metabion | Desalted |
| chr21:45056373_R   | Pho |  | TCGTGGAAGGAGAGAATGAGCTGGAACNNNNCTGGAGCTGTCTGCGACTTT  | Metabion | Desalted |
| chr21:45254594_R   | Pho |  | ATTTCTGTGCTCACGAGTAGAAAACACNNNNCTGGAGCTGTCTGCGACTTT  | Metabion | Desalted |
| chr21:45982832_R   | Pho |  | CCTAAGGTTGGGCGAGCGTTGCCCTGANNNNNCTGGAGCTGTCTGCGACTTT | Metabion | Desalted |
| chr21:46125933_R   | Pho |  | CAAGGAGAGCCGGCGCCAGAAGACACGNNNNCTGGAGCTGTCTGCGACTTT  | Metabion | Desalted |
| chr21:46370078_R   | Pho |  | GATACACTTGGAGCCGCTGGATTGTGCNNNNCTGGAGCTGTCTGCGACTTT  | Metabion | Desalted |
| microRNA universal | Pho |  | AGATCGGAAGAGCACACGTCTCTGGAGCTGTCTGCGACTTT            | Metabion | Desalted |
| hsa-miR-21-5p      |     |  | ACGACGCTCTCCGATCTNNNNNNNTAGCTTATCAGACTGATGTTGA       | Metabion | Desalted |
| hsa-miR-449a       |     |  | ACGACGCTCTCCGATCTNNNNNNNTGGCAGTGTATTGTTAGCTGGT       | Metabion | Desalted |
| hsa-miR-151a-5p    |     |  | ACGACGCTCTCCGATCTNNNNNNNTCGAGGACTCACAGTCTAGT         | Metabion | Desalted |
| hsa-miR-196b-5p    |     |  | ACGACGCTCTCCGATCTNNNNNNNTAGGTAGTTTCCTGTTGTTGGG       | Metabion | Desalted |
| hsa-miR-191-5p     |     |  | ACGACGCTCTCCGATCTNNNNNNNcaacggaatccaaagcagctg        | Metabion | Desalted |
| hsa-miR-127-3p     |     |  | ACGACGCTCTCCGATCTNNNNNNNtcggatccgctgagcttgct         | Metabion | Desalted |
| hsa-miR-186-5p     |     |  | ACGACGCTCTCCGATCTNNNNNNNcaagaattctctttggct           | Metabion | Desalted |
| hsa-miR-182-5p     |     |  | ACGACGCTCTCCGATCTNNNNNNNttggcaatgtagaactcact         | Metabion | Desalted |
| hsa-miR-21-3p      |     |  | ACGACGCTCTCCGATCTNNNNNNNcaacaccagctgagctgct          | Metabion | Desalted |
| hsa-miR-126-3p     |     |  | ACGACGCTCTCCGATCTNNNNNNNtcgtaccgtgagtaataatgcg       | Metabion | Desalted |
| hsa-miR-30b-5p     |     |  | ACGACGCTCTCCGATCTNNNNNNNtgtaaacatctacactcagct        | Metabion | Desalted |
| hsa-miR-221-3p     |     |  | ACGACGCTCTCCGATCTNNNNNNNagctacattgctgctggtttc        | Metabion | Desalted |
| hsa-miR-411-5p     |     |  | ACGACGCTCTCCGATCTNNNNNNNtagtagaccgtatagcgtacg        | Metabion | Desalted |
| hsa-miR-429        |     |  | ACGACGCTCTCCGATCTNNNNNNNtaatactgctggtaaaaccgt        | Metabion | Desalted |
| hsa-miR-93-5p      |     |  | ACGACGCTCTCCGATCTNNNNNNNcaaaagtctgttcgtagcaggtag     | Metabion | Desalted |
| hsa-miR-24-3p      |     |  | ACGACGCTCTCCGATCTNNNNNNNtgctcagctcagcaggaacag        | Metabion | Desalted |
| hsa-miR-532-5p     |     |  | ACGACGCTCTCCGATCTNNNNNNNcatgcctgagtgtaggaccgt        | Metabion | Desalted |
| hsa-miR-345-5p     |     |  | ACGACGCTCTCCGATCTNNNNNNNgtgactcctagtccagggtc         | Metabion | Desalted |
| hsa-miR-140-3p     |     |  | ACGACGCTCTCCGATCTNNNNNNNtaccacagggtagaaccacgg        | Metabion | Desalted |
| hsa-miR-31-5p      |     |  | ACGACGCTCTCCGATCTNNNNNNNaggcaagatgctggcatagct        | Metabion | Desalted |
| hsa-miR-136-3p     |     |  | ACGACGCTCTCCGATCTNNNNNNNcatcatcgtctcaaatgagct        | Metabion | Desalted |
| hsa-miR-28-5p      |     |  | ACGACGCTCTCCGATCTNNNNNNNaaaggagctcacagctattgag       | Metabion | Desalted |
| hsa-miR-484        |     |  | ACGACGCTCTCCGATCTNNNNNNNtcaggctcagctcccctccgat       | Metabion | Desalted |
| hsa-miR-210-3p     |     |  | ACGACGCTCTCCGATCTNNNNNNNctgtgctgtgacagcggctga        | Metabion | Desalted |

|                |  |  |                                                   |          |          |
|----------------|--|--|---------------------------------------------------|----------|----------|
| hsa-miR-128-3p |  |  | ACGACGCTCTCCGATCTNNNNNNNNtcacagtgaaccggtctcttt    | Metabion | Desalted |
| hsa-miR-363-3p |  |  | ACGACGCTCTCCGATCTNNNNNNNNNaattgcacggtatccatctgta  | Metabion | Desalted |
| hsa-miR-183-5p |  |  | ACGACGCTCTCCGATCTNNNNNNNNtattggcactggtagaattcact  | Metabion | Desalted |
| hsa-miR-542-3p |  |  | ACGACGCTCTCCGATCTNNNNNNNNtgtgacagattgataactgaaa   | Metabion | Desalted |
| hsa-miR-335-5p |  |  | ACGACGCTCTCCGATCTNNNNNNNNtcaagagcaataacgaaaaatgt  | Metabion | Desalted |
| hsa-miR-342-3p |  |  | ACGACGCTCTCCGATCTNNNNNNNNtctcacacagaaatcgaccctgt  | Metabion | Desalted |
| hsa-miR-425-5p |  |  | ACGACGCTCTCCGATCTNNNNNNNNNaatgacacgatcactcccgtgga | Metabion | Desalted |
| hsa-miR-421    |  |  | ACGACGCTCTCCGATCTNNNNNNNNNatcaacagacattaattgggagc | Metabion | Desalted |
| hsa-miR-454-3p |  |  | ACGACGCTCTCCGATCTNNNNNNNNtagtgcaatattgcttatagggt  | Metabion | Desalted |
| hsa-miR-361-5p |  |  | ACGACGCTCTCCGATCTNNNNNNNNttatcagaatctccaggggtac   | Metabion | Desalted |
| hsa-miR-214-5p |  |  | ACGACGCTCTCCGATCTNNNNNNNNtgctgtctacactgctgtgc     | Metabion | Desalted |
| hsa-miR-221-5p |  |  | ACGACGCTCTCCGATCTNNNNNNNNnacctggcatacaatgtagatt   | Metabion | Desalted |
| hsa-miR-136-5p |  |  | ACGACGCTCTCCGATCTNNNNNNNNnactccattgtttgatgatgga   | Metabion | Desalted |
| hsa-miR-493-5p |  |  | ACGACGCTCTCCGATCTNNNNNNNNttgacatgtaggctttcatt     | Metabion | Desalted |
| hsa-miR-17-3p  |  |  | ACGACGCTCTCCGATCTNNNNNNNNnactgcagtgaaaggcactgtgag | Metabion | Desalted |
| hsa-miR-493-3p |  |  | ACGACGCTCTCCGATCTNNNNNNNNtgaaggctactgtgtgccagg    | Metabion | Desalted |
| hsa-miR-140-5p |  |  | ACGACGCTCTCCGATCTNNNNNNNNcagtggtttaccctatggtag    | Metabion | Desalted |
| hsa-miR-143-5p |  |  | ACGACGCTCTCCGATCTNNNNNNNNnggtgcagtgctgcctctctgt   | Metabion | Desalted |
| hsa-miR-330-5p |  |  | ACGACGCTCTCCGATCTNNNNNNNNtctctggcctgtgtcttaggc    | Metabion | Desalted |
| hsa-miR-431-5p |  |  | ACGACGCTCTCCGATCTNNNNNNNNtctgttgaggccgtcatgca     | Metabion | Desalted |
| hsa-miR-542-5p |  |  | ACGACGCTCTCCGATCTNNNNNNNNtcggggatcatatgacagaga    | Metabion | Desalted |
| hsa-miR-432-5p |  |  | ACGACGCTCTCCGATCTNNNNNNNNtctggagtaggtcattgggtgg   | Metabion | Desalted |
| hsa-miR-505-3p |  |  | ACGACGCTCTCCGATCTNNNNNNNNcgtaacacttgctggttctct    | Metabion | Desalted |
| hsa-miR-324-3p |  |  | ACGACGCTCTCCGATCTNNNNNNNNnactgcccagggtgctgctgg    | Metabion | Desalted |
| hsa-miR-377-3p |  |  | ACGACGCTCTCCGATCTNNNNNNNNNatcacacaaggcaactttgt    | Metabion | Desalted |
| hsa-miR-454-5p |  |  | ACGACGCTCTCCGATCTNNNNNNNNnacccatcaatattgtctctgc   | Metabion | Desalted |

NNNN are four random nucleotides used as a unique molecular identifier (UMI)

NNNNNNNN are eight random nucleotides used as a unique molecular identifier (UMI)

LNA bases are +G
